# Supplementary material for: Association between perceived stress, multimorbidity and primary care health services: a Danish population-based cohort study
Source: PubMed Central journal article supplement — BMJ Open. 2018 Feb 24;8(2):e018323. doi: 10.1136/bmjopen-2017-018323 (PMC5855234; doi:10.1136/bmjopen-2017-018323), 2018-02-24
Supplement: bmjopen-2017-018323.draft_revisions.pdf [file bmjopen-2017-018323.draft_revisions.pdf]

# BMJ Open

BMJ Open is committed to open peer review. As part of this commitment we make the peer review history of every article we publish publicly available.

When an article is published we post the peer reviewers' comments and the authors' responses online. We also post the versions of the paper that were used during peer review. These are the versions that the peer review comments apply to.

The versions of the paper that follow are the versions that were submitted during the peer review process. They are not the versions of record or the final published versions. They should not be cited or distributed as the published version of this manuscript.

BMJ Open is an open access journal and the full, final, typeset and author-corrected version of record of the manuscript is available on our site with no access controls, subscription charges or pay-per-view fees (<http://bmjopen.bmj.com>).

If you have any questions on BMJ Open's open peer review process please email [info.bmjopen@bmj.com](mailto:info.bmjopen@bmj.com)

# BMJ Open

## Perceived stress, multimorbidity, and use of primary care health services

|                                 |                                                                                                                                                                                                                                                                                                                                                                                                                                                                                                                                                         |
|---------------------------------|---------------------------------------------------------------------------------------------------------------------------------------------------------------------------------------------------------------------------------------------------------------------------------------------------------------------------------------------------------------------------------------------------------------------------------------------------------------------------------------------------------------------------------------------------------|
| Journal:                        | <i>BMJ Open</i>                                                                                                                                                                                                                                                                                                                                                                                                                                                                                                                                         |
| Manuscript ID                   | bmjopen-2017-018323                                                                                                                                                                                                                                                                                                                                                                                                                                                                                                                                     |
| Article Type:                   | Research                                                                                                                                                                                                                                                                                                                                                                                                                                                                                                                                                |
| Date Submitted by the Author:   | 20-Jun-2017                                                                                                                                                                                                                                                                                                                                                                                                                                                                                                                                             |
| Complete List of Authors:       | Prior, Anders; Aarhus University, Research Unit for General Practice; Aarhus University, Section for General Medical Practice<br>Vestergaard, Mogens; Aarhus Universitet, Research Unit for General Practice; Aarhus University, Section for General Medical Practice<br>Larsen, Karen; Research Unit for General Practice, Department of Public Health; Aarhus University, Section for General Medical Practice<br>Fenger-Gron, Morten; Aarhus University, Research Unit for General Practice; Aarhus University, Section for General Medical Practice |
| <b>Primary Subject Heading</b>: | General practice / Family practice                                                                                                                                                                                                                                                                                                                                                                                                                                                                                                                      |
| Secondary Subject Heading:      | Mental health, Epidemiology                                                                                                                                                                                                                                                                                                                                                                                                                                                                                                                             |
| Keywords:                       | stress, psychological, primary health care, family practice, general practice, comorbidity, practice patterns, physicians'                                                                                                                                                                                                                                                                                                                                                                                                                              |
|                                 |                                                                                                                                                                                                                                                                                                                                                                                                                                                                                                                                                         |

SCHOLARONE™  
Manuscripts

Only

## Perceived stress, multimorbidity, and use of primary care health services

Anders Prior<sup>1</sup>, MD; Mogens Vestergaard<sup>1</sup>, PhD; Karen Kjær Larsen<sup>1</sup>, PhD; Morten Fenger-Grøn<sup>1</sup>, MSc

1. Research Unit for General Practice and Section for General Medical Practice, Department of Public Health, Aarhus University, Denmark

**Correspondence to:** Anders Prior, MD

Research Unit for General Practice and Section for General Medical Practice, Department of Public Health, Aarhus University, Bartholins Allé 2, DK-8000, Aarhus, Denmark

Phone: +45 8716 7948 Fax: +45 8612 4788 Email: anders.prior@ph.au.dk

**Word count:** 2,518

## Abstract

### Objectives

Mental stress is common in the general population. Mounting evidence suggests that mental stress is associated with multimorbidity, suboptimal care, and increased mortality. Delivering healthcare in a bio-psycho-social context is key for general practitioners (GPs), but it remains unclear how persons with high levels of perceived stress are managed in primary care. Our aim was to describe the association between perceived stress and primary care services by focussing on mental health related activities and markers of elective/acute care while accounting for mental-physical multimorbidity.

### Design

Population-based cohort study.

### Setting

Primary health care in Denmark.

### Participants

118,410 participants from the Danish National Health Survey 2010 followed for one year. Information on perceived stress and lifestyle was obtained from a survey questionnaire. Information on multimorbidity was obtained from health registers.

### Outcome measures

General daytime consultations, out-of-hours services, mental health related services, and chronic care services in primary care obtained from health registers.

### Results

Perceived stress levels were associated with primary care activity in a dose-response relation when adjusted for underlying conditions, lifestyle, and socioeconomic factors. In the highest stress quintile, 6.8% received GP talk therapy (highest versus lowest quintile, adjusted incidence rate ratios (IRR): 4.96, 95% CI: 4.20–5.86), 3.3% consulted a psychologist (IRR: 6.49, 95% CI: 4.90–8.58), 21.5% redeemed an

1  
2  
3 antidepressant prescription (IRR: 4.62, 95% CI: 4.03–5.31), 23.8% received annual chronic care  
4  
5 consultations (IRR: 1.22, 95% CI: 1.16–1.29), and 26.1% used out-of-hours services (IRR: 1.47, 95% CI:  
6  
7 1.51–1.68). For those with multimorbidity, stress was associated with more out-of-hours services, but  
8  
9 not with more chronic care services.  
10

## 11 **Conclusion**

12  
13  
14  
15  
16 Persons with high stress levels generally had higher use of primary health care, 4–6 times higher use of  
17  
18 mental health related services (most often in the form of psychotropic drug prescriptions), but less timely  
19  
20 use of chronic care services.  
21  
22

23  
24  
25 **Keywords (MeSH):** stress, psychological; practice patterns, physicians'; primary health care; family  
26  
27  
28 practice; general practice; comorbidity  
29  
30  
31  
32  
33  
34  
35  
36  
37  
38  
39  
40  
41  
42  
43  
44  
45  
46  
47  
48  
49  
50  
51  
52  
53  
54  
55  
56  
57  
58  
59  
60

## Article summary

### Strengths and limitations of this study

- Mental stress is common and detrimental for the health, but little is known about the management of persons with high levels of perceived stress in primary care.
- This is the first population-based cohort study to investigate the association between stress perception and general practice utilization taking multimorbidity into account.
- In total, 118,410 persons who participated in the Danish National Health Survey of 2010 and filled out the Perceived Stress Scale questionnaire were followed, and information on daytime services, out-of-hours services, chronic care services, and mental health related services were obtained from national health registries.
- Multimorbidity was assessed using register-based data on diagnoses and medicine prescriptions of 39 mental and physical conditions.
- Limitations of this study include the lack of non-respondents' stress data, lack of private practice psychologist service data, and no access to GP medical records to explore details of provided services and diagnoses.

## Introduction

Mental stress is common in the general population<sup>1,2</sup> and an increasingly common reason for contacting the general practitioner (GP).<sup>3</sup> Persons with high levels of perceived stress have higher physical disease burden, impaired prognosis of physical disease, more potentially preventable hospitalisations, and higher mortality than persons with low levels of perceived stress, even after adjusting for mental-physical multimorbidity.<sup>2,4</sup> However, little is known about the services provided by GPs and other health professionals in primary care to persons with high levels of perceived stress. No official treatment guidelines exist, and the care may differ depending on the burden of mental and physical comorbidities. We aimed to describe the frequency of daytime and out-of-hours contacts according to perceived stress level and multimorbidity status in a large population-based cohort based on health registry data and information on perceived stress and lifestyle measures. Specifically, we focused on mental health related primary care services, psychotropic medication, and selected markers of the balance between elective chronic care and acute out-of-hours services.

## Methods

### *Study population, design and setting*

The study population consisted of respondents (age > 25 years) from the nationwide Danish National Health Survey of 2010.<sup>5</sup> Survey questionnaires were collected by 1 May 2010 (index date). We excluded persons who died or emigrated before this date (2,235 persons). A total of 118,410 (response rate: 56%) returned the questionnaire with information on all perceived stress items.

1  
2  
3 We conducted a population-based cohort study with follow-up until death, emigration, or end-of-study  
4 after one year (1 May 2011), whichever came first. Using the personal identification number assigned to  
5 all Danish citizens,<sup>6</sup> we linked individual-level data across survey responses and health registers. Almost  
6 all Danish citizens are listed with a GP providing them with universal tax-funded access to health care.<sup>7</sup>  
7  
8 The GP acts as a gatekeeper to secondary care<sup>8</sup> and may refer to other publicly funded services in  
9 primary care. Referrals to private practice psychiatrists are fully covered by the health care system.  
10 Referrals to psychologists are partly covered if certain criteria are fulfilled, e.g. a diagnosis of depression  
11 or anxiety, or loss of a first-degree relative, but not high perceived stress in itself.  
12  
13  
14  
15  
16  
17  
18  
19  
20  
21  
22  
23  
24

#### 25 *Perceived stress*

26  
27  
28 In the survey questionnaire, perceived stress was measured using Cohen's widely used validated  
29 Perceived Stress Scale (PSS).<sup>9-11</sup> The PSS is based on a five level Likert-style questionnaire with items on  
30 general stress, coping, and feeling of control. The 10-item Danish version produces a sum score of 0–40;  
31 40 points represent the highest perceived stress level. The stress score was divided into quintiles to  
32 assess potential non-linear relations with outcomes.  
33  
34  
35  
36  
37  
38  
39  
40  
41  
42  
43

#### 44 *Multimorbidity*

45  
46 The participant's health status on the index date was assessed using a multimorbidity index of eight  
47 psychiatric and 31 physical long-term conditions (eTable 1) identified in nationwide health registers by a  
48 previously described algorithm.<sup>2</sup> Multimorbidity was defined as two or more coexisting conditions.<sup>12</sup>  
49  
50  
51  
52  
53  
54  
55  
56  
57  
58  
59  
60



### *Outcomes*

Our main outcomes of interest were categorised into two groups: 1) services related to mental health (GP talk therapy, GP psychometric tests, and sessions with a publicly reimbursed private practicing psychologist or psychiatrist) and redemption of psychotropic medication, 2) services in general practice related to elective chronic care (spirometry test for lung disease, blood sugar sampling for diabetes, electrocardiograms (ECGs) and home blood pressure monitoring for cardiovascular disease, and annual chronic care consultations [a single annual review meeting per chronic disease per patient]), and out-of-hours services (telephone or face-to-face contact with GP). We also assessed the overall rate of daytime face-to-face contacts with GPs.

The Danish National Health Service Register provided data on all publicly reimbursed services performed by Danish GPs, psychologists, and psychiatrists.<sup>13</sup> The Danish National Prescription Registry provided data on redeemed drug prescriptions from all Danish pharmacies.<sup>14</sup> Service codes and “Anatomical Therapeutic Chemical” (ATC) medication codes used to identify the outcomes can be found in the Appendix (eTable 2).

### *Other covariates*

Information on highest achieved education level according to the UNESCO classification system,<sup>15</sup> cohabitation status, and ethnicity was obtained from Statistics Denmark.<sup>16</sup> The Danish Civil Registration System provided information on sex, age, and vital status.<sup>6</sup> Information on working status and lifestyle factors (physical activity, body mass index, and alcohol, smoking, and dietary habits) was obtained from the survey.

### *Statistical analysis*

Cumulative incidence proportions (CIPs) at one year after the index date and incidence rates (IRs) during follow-up were calculated for all investigated primary care activities. We used a negative binomial regression model to calculate incidence rate ratios (IRRs) by PSS score quintiles and assigned the first PSS quintile as the reference. We then adjusted for sex, age as 10-year age bands, presence of each of the 39 conditions in the multimorbidity index, lifestyle factors, and socioeconomic factors on the index date. We included the time at risk to account for death or immigration in both models. Cluster robust variance estimation was used to estimate 95% confidence intervals (95% CIs) to account for inter-individual heterogeneity. We imputed missing data on lifestyle and socioeconomic factors in a chained equations model of all our analysis parameters and produced 20 imputation sets.<sup>17</sup> To assess the effect modification from disease burden, we stratified the analyses on the number of the 31 physical conditions of the multimorbidity index.

The sensitivity analyses included: 1) analysis including only persons without psychiatric illness, 2) analyses of general primary care outcomes by survey response status using register-based information and psychiatric illness as a proxy for stress, and 3) complete-case analysis excluding persons with missing data.

All analyses were performed using Stata 13.1 (StataCorp, College Station, TX).

The study has been performed in accordance with the STROBE guidelines.

## **Results**

The median age was 54 years (interquartile range: 23 years). The median PSS score was 11. Within the one year of follow-up, the study population was at risk for 117,856 person-years. A total of 1,042,353 reimbursed primary care services and 85,962 redeemed psychotropic prescriptions of interest were

1  
2  
3 recorded. The perceived stress levels were generally higher for women and tended to increase with  
4  
5 increasing number of physical conditions and presence of psychiatric morbidity (Table 1). The  
6  
7 distribution of survey variables across PSS quintiles has been reported elsewhere.<sup>2</sup>  
8  
9

10 For all primary care activities, except home blood pressure monitoring, a dose-response relation seemed  
11  
12 to exist between the perceived stress level and the probability of receiving a primary care service or  
13  
14 psychotropic prescription during follow-up (Tables 2 and 3, 1-year CIPs). The highest IRRs associated  
15  
16 with perceived stress were found for mental health related activities, but adjustments attenuated the  
17  
18 association (Table 2, IRRs). Among the highest stress quintile, 6.8% received GP talk therapy (highest  
19  
20 versus lowest PSS quintile; adjusted IRR: 4.96, 95% CI: 4.20–5.86), 3.3% consulted a psychologist (IRR:  
21  
22 6.49, 95% CI: 4.90–8.58), 3.7% consulted a psychiatrist (IRR: 13.26, 95% CI: 8.33–21.09), 21.5%  
23  
24 redeemed an antidepressant prescription (IRR: 4.62, 95% CI: 4.03–5.31), 23.8% received annual chronic  
25  
26 care consultations (IRR: 1.22, 95% CI: 1.16–1.29) and 26.1% used out-of-hours services (IRR: 1.47, 95%  
27  
28 CI: 1.51–1.68). The proportion of persons who visited their GP at least once during the follow-up year  
29  
30 rose with increasing stress levels from 77% to 89% (Table 3).  
31  
32  
33  
34  
35

36 The IRRs for receiving a mental health related service generally remained stable across PSS quintiles,  
37  
38 regardless of underlying disease count (Figure 1, IRRs). However, in absolute terms, the use of talk  
39  
40 therapy and psychologist services decreased and psychotropic drug prescriptions increased with  
41  
42 increasing numbers of physical conditions (Figure 1, 1-year CIP).  
43  
44  
45

46 Nearly all persons with physical multimorbidity visited their GP during the investigated year.

47  
48 Multimorbidity in itself was associated with use of elective chronic care services, i.e. annual chronic care  
49  
50 consultations, blood sugar measures, ECGs and home blood pressure monitoring (Figure 2). In those  
51  
52 with multimorbidity, higher stress levels were not associated with more elective chronic care services  
53  
54 than lower stress levels. In absolute numbers, the use of chronic care services tended to decrease with  
55  
56  
57  
58  
59  
60

1  
2  
3 increasing stress level. Stress was generally associated with use of acute out-of-hours services,  
4  
5 regardless of multimorbidity level, but those with multimorbidity tended to have higher use (Figure 2).  
6  
7  
8  
9

### 10 11 *Sensitivity analyses*

12  
13  
14 Excluding persons with psychiatric illness from the analyses did not change the overall pattern of  
15  
16 primary care activities (eTable 3). The non-response analyses showed that survey non-respondents more  
17  
18 often were men and mentally ill ( $p<0.001$ ) and less often used daytime consultations and services  
19  
20 related to chronic care (eTable 4). The adjusted IRRs of general primary care services were similar,  
21  
22 regardless of response status when using psychiatric illness as a proxy for high levels of perceived stress  
23  
24 (eTable 5). The complete case analysis showed virtually no differences from our main analysis with  
25  
26 multiple imputed data (data not shown).  
27  
28  
29  
30  
31  
32  
33  
34

## 35 **Discussion**

### 36 37 *Summary*

38  
39  
40  
41 This population-based cohort study showed that the primary care activities increased with increasing  
42  
43 perceived stress levels, even after adjusting for co-existing mental and physical conditions, lifestyle, and  
44  
45 socioeconomic factors. However, few persons with high levels of perceived stress received mental  
46  
47 health services, and more persons received psychotropic medication prescriptions than talk therapy.  
48  
49  
50 The rate of preventive services, e.g. annual chronic care consultations and disease monitoring tests, did  
51  
52 not increase with increasing stress levels in persons with multimorbidity. Most persons with high stress  
53  
54  
55  
56  
57  
58  
59  
60

1  
2  
3 levels were in contact with their GP during the investigated year and had higher use of out-of-hours  
4  
5 services than those with low stress levels.  
6  
7  
8  
9

### 10 11 *Strengths and limitations* 12

13  
14 This study was based on unique information on stress levels and lifestyle factors in a large random  
15  
16 sample of the Danish background population. The Danish Civil Registration System<sup>6</sup> allowed us to link  
17  
18 information across health care registers and ensured no loss to follow-up.  
19  
20

21  
22 Non-respondents tended to be different from survey respondents. Therefore, the absolute number of  
23  
24 contacts to primary health care in our study may not be generalisable to the whole population.  
25

26  
27 However, we have no reason to believe that response status affected the adjusted association between  
28  
29 perceived stress and use of primary health care as the service use was similar among respondents and  
30  
31 non-respondents using a proxy for stress.  
32  
33

34  
35 Danish health register data are prospectively recorded and validated; these data are considered to be of  
36  
37 high quality.<sup>6,13,14</sup> All GPs report their patients' service use, and all pharmacies report redeemed  
38  
39 prescriptions.<sup>7</sup> As reporting of primary care services is economically incentivised, high completeness is  
40  
41 expected.<sup>13</sup> Reporting may be incomplete if the GP forgets to register a service (e.g. talk therapy).  
42

43  
44 However, the GP's reporting is probably unaffected by patient stress levels; a potential misclassification  
45  
46 is thus non-differential. Patients with more severe or complicated chronic disease may be followed in  
47  
48 outpatient clinics and have fewer GP chronic care visits. If stress level was a marker of disease severity,  
49  
50 this may explain the lack of association between stress and chronic care services among persons with  
51  
52 multimorbidity. Psychologist services are probably well recorded in the health registers for  
53  
54 reimbursement purposes, whereas visits paid by e.g. insurance companies and municipal or private  
55  
56  
57  
58  
59  
60

1  
2  
3 organisations are not; the use of psychologists may hence be underestimated in our study. The lack of a  
4  
5 Danish register for primary care diagnoses meant that multimorbidity status was based on outpatient  
6  
7 and hospital discharge diagnoses combined with recordings of repeated prescriptions. This provided us  
8  
9 with information on chronic conditions commonly managed in primary care, but the capture may not be  
10  
11 complete.<sup>2</sup>  
12  
13

14  
15 The combined data sources from survey and registers allowed us to adjust for demographic, lifestyle,  
16  
17 and socioeconomic confounders known to be associated with perceived stress.<sup>2</sup> Adjusting tended to  
18  
19 attenuate associations, but most outcome estimates remained significantly associated with the level of  
20  
21 perceived stress. Some adjustment variables could be intermediate variables. Adjusting for them would  
22  
23 underestimate the true association, but we chose this approach as it yields the most conservative  
24  
25 estimates.<sup>18</sup>  
26  
27

### 28 29 30 31 32 *Comparison with existing literature* 33

34  
35 To our knowledge, this is the first study to describe links between specific primary care services and  
36  
37 level of stress as perceived by the patient. Existing evidence on the association between mental health  
38  
39 and primary health care use is generally in line with our findings: psychosocial factors,<sup>19</sup> mental health  
40  
41 problems,<sup>20-22</sup> and illness perception<sup>23</sup> was associated with frequent GP attendance even after  
42  
43 accounting for the strong association between mental illness and physical health.<sup>24-26</sup> Multimorbidity is  
44  
45 expected to increase the number of primary care consultations,<sup>27-29</sup> which is confirmed by our study.  
46  
47  
48  
49  
50  
51  
52

### 53 *Implications for research and practice* 54 55 56 57 58 59 60

1  
2  
3 Stress appraisal was positively related to primary care activity level, regardless of mental and physical  
4 disease burden. However, the interpretation of appropriateness is difficult. A high level of perceived  
5 stress in itself does not justify a psychiatric diagnosis. As no official guidelines exist for non-syndromic  
6 stress in general practice, we cannot conclude whether the level of mental health related activities is  
7 appropriate. Interestingly, the treatment frequency was higher for antidepressants than for talk therapy  
8 provided by GPs or psychologist services. This tendency was stronger for persons with the highest stress  
9 levels and multimorbidity, especially three or more physical conditions. The underlying explanation for  
10 this association remains unknown, but persons with stress and physical multimorbidity may have a  
11 lower surplus of mental resources to interact in psychological treatment, or the complexity of health  
12 problems makes the GP decide to use the less resource-demanding pharmacological treatment. Yet,  
13 these treatment choices may be in contrast to the more general approach to mental health problems:  
14 Danish and international treatment guidelines recommend stepped care, where psychoeducation and  
15 psychosocial or psychological interventions are the first steps of choice before pharmacological  
16 treatment.<sup>30,31</sup>

17  
18  
19 High stress levels in patients with multimorbidity are associated with suboptimal care and adverse  
20 outcomes, e.g. more potentially preventable hospitalisations and high mortality.<sup>2,4</sup> Nevertheless, high  
21 stress levels were not associated with higher use of preventive chronic care services. This potential  
22 undertreatment or lack of timely chronic disease management in persons with mental-physical  
23 multimorbidity may play a role in the explanation of adverse outcomes. Conversely, highly stressed  
24 persons requested acute out-of-hours services more often than the less stressed, which is generally  
25 seen as a less desirable contact pattern for chronic disease management.<sup>32</sup>

26  
27  
28 The appropriate number of GP contacts and prescriptions for certain disease combinations cannot be  
29 deducted from our data because no information was available on the individual's full medical

1  
2  
3 complexity, self-efficacy, and social network. However, persons with high stress levels seemed to have a  
4  
5 less timely appropriate use of primary care services. This, in addition to a poorer prognosis, calls for  
6  
7 more focus on the mental well-being of patients even when no psychiatric illness is diagnosed. This also  
8  
9 underlines the importance of the psychological aspect in the bio-psycho-social approach to treatment of  
10  
11 persons with multimorbidity.  
12  
13

14  
15 No validated clinical instrument is available for stress screening in general practice, and it is uncertain if  
16  
17 screening is a good solution. Additionally, the GP may have a limited offer to patients with stress as no  
18  
19 well-developed management guidelines exist. More importantly, the time frame and setting in which  
20  
21 the GP meets the patient should support the assessment of the patient's mental well-being and  
22  
23 resources. Patient-centred care is essential in achieving this goal.<sup>33,34</sup> Stress-alleviating interventions may  
24  
25 improve the prognosis if the association between perceived stress and adverse outcomes is causal;  
26  
27 mindfulness-based stress reduction could play a role.<sup>35</sup> Some evidence suggests that a collaborative and  
28  
29 integrative approach may be beneficial in patients with mental-physical multimorbidity,<sup>36,37</sup> but more  
30  
31 systematic research on stress and multimorbidity in primary care is needed.  
32  
33  
34  
35  
36  
37  
38  
39  
40  
41  
42  
43  
44  
45  
46  
47  
48  
49  
50  
51  
52  
53  
54  
55  
56  
57  
58  
59  
60



## Additional information

**Funding:** This work was supported by an unrestricted grant (grant number: R155-2012-11280) from the Lundbeck Foundation (MEPRICA), by the Program for Clinical Research Infrastructure (PROCRIN) established by the Lundbeck Foundation and the Novo Nordisk Foundation and administered by Danish Regions, and by the Central Denmark Region Foundation for Primary Health Care Research. The Danish Health Profile 2010 was funded by the Capital Region of Denmark, Region Zealand, the Region of Southern Denmark, the Central Denmark Region, the North Denmark Region, the Danish Ministry of Interior and Health, and the National Institute of Public Health at the University of Southern Denmark. The funding sources had no role in the design and conduct of the study; collection, management, analysis, and interpretation of the data; and preparation, review, or approval of the manuscript.

**Ethical approval:** The study was approved by the Danish Data Protection Agency (record number 2013-41-1719). All data were anonymized and securely stored at Statistics Denmark.

**Competing interests:** None declared.

**Acknowledgements:** Data support was given by the National Centre for Register-Based Research, Aarhus BSS, Aarhus University, Denmark.

**Author statement:** AP, MFG, KKL, and MV conceived the study. Data collection and analyses were mainly done by AP and MFG. AP wrote the first draft. All authors contributed to the interpretation of data, the preparation of the manuscript and approved the final version.

**Data sharing statement:** No additional data available.

## References

1. Nielsen L, Curtis T, Kristensen TS, Rod Nielsen N. What characterizes persons with high levels of perceived stress in Denmark? A national representative study. *Scand J Public Health*. 2008;36(4):369-379.
2. Prior A, Fenger-Grøn M, Larsen KK, et al. The association between perceived stress and mortality among people with multimorbidity: A prospective population-based cohort study. *Am J Epidemiol*. 2016;184(3):199-210.
3. Moth G, Olesen F, Vedsted P. Reasons for encounter and disease patterns in Danish primary care: Changes over 16 years. *Scand J Prim Health Care*. 2012;30(2):70-75.
4. Prior A, Vestergaard M, Davydow DS, Larsen KK, Ribe AR, Fenger-Grøn M. Perceived stress, multimorbidity, and risk for hospitalizations for ambulatory care-sensitive conditions: A population-based cohort study. *Med Care*. 2016:In Press.
5. Christensen AI, Ekholm O, Glumer C, et al. The Danish National Health Survey 2010. Study design and respondent characteristics. *Scand J Public Health*. 2012;40(4):391-397.
6. Pedersen CB, Gotzsche H, Moller JO, Mortensen PB. The Danish civil registration system. A cohort of eight million persons. *Dan Med Bull*. 2006;53(4):441-449.
7. Christiansen T. Organization and financing of the Danish health care system. *Health Policy*. 2002;59(2):107-118.
8. Velasco Garrido M, Zentner A, Busse R. The effects of gatekeeping: A systematic review of the literature. *Scand J Prim Health Care*. 2011;29(1):28-38.

- 1  
2  
3 9. Cohen S, Kamarck T, Mermelstein R. A global measure of perceived stress. *J Health Soc Behav.*  
4  
5 1983;24(4):385-396.  
6  
7  
8  
9 10. Cohen S, Williamson G. Perceived stress in a probability sample in the United States  
10  
11 In: Spacapan S, Oskamp S, eds. *The social psychology of health*. Newbury Park, CA: SAGE; 1988:31-67.  
12  
13  
14 11. Lee E. Review of the psychometric evidence of the perceived stress scale. *Asian Nursing Research.*  
15  
16 2012;6(4):121-127.  
17  
18  
19  
20 12. Valderas JM, Starfield B, Sibbald B, Salisbury C, Roland M. Defining comorbidity: Implications for  
21  
22 understanding health and health services. *Ann Fam Med.* 2009;7(4):357-363.  
23  
24  
25  
26 13. Andersen JS, Olivarius Nde F, Krasnik A. The Danish National Health Service Register. *Scand J Public*  
27  
28 *Health.* 2011;39(7 Suppl):34-37.  
29  
30  
31 14. Kildemoes HW, Sorensen HT, Hallas J. The Danish National Prescription Registry. *Scand J Public*  
32  
33 *Health.* 2011;39(7 Suppl):38-41.  
34  
35  
36  
37 15. United Nations Educational, Scientific and Cultural Organization. International standard classification  
38  
39 of education (ISCED). <http://www.uis.unesco.org/Education/Documents/isced-2011-en.pdf>. Accessed 10  
40  
41 December 2015.  
42  
43  
44  
45 16. Statistics Denmark. Statistics Denmark. Statistics Denmark Web site.  
46  
47 [http://www.dst.dk/ext/645846915/0/forskning/Access-to-micro-data-at-Statistics-Denmark\\_2014--pdf](http://www.dst.dk/ext/645846915/0/forskning/Access-to-micro-data-at-Statistics-Denmark_2014--pdf).  
48  
49 Updated 2014. Accessed 20 May 2015.  
50  
51  
52  
53 17. White IR, Royston P, Wood AM. Multiple imputation using chained equations: Issues and guidance  
54  
55 for practice. *Stat Med.* 2011;30(4):377-399.  
56  
57  
58  
59  
60

- 1  
2  
3 18. Rothman KJ, Greenland S, Lash TL. *Modern epidemiology*. 3rd ed. Philadelphia, PA: Lippincott  
4 Williams & Wilkins; 2008.  
5  
6  
7  
8  
9 19. Bellon JA, Delgado-Sanchez A, de Dios Luna J, Lardelli-Claret P. Patient psychosocial factors and  
10 primary care consultation: A cohort study. *Fam Pract*. 2007;24(6):562-569.  
11  
12  
13  
14 20. Dowrick CF, Bellon JA, Gomez MJ. GP frequent attendance in Liverpool and Granada: The impact of  
15 depressive symptoms. *Br J Gen Pract*. 2000;50(454):361-365.  
16  
17  
18  
19  
20 21. Vedsted P, Fink P, Olesen F, Munk-Jorgensen P. Psychological distress as a predictor of frequent  
21 attendance in family practice: A cohort study. *Psychosomatics*. 2001;42(5):416-422.  
22  
23  
24  
25  
26 22. Bellon JA, Delgado A, Luna JD, Lardelli P. Psychosocial and health belief variables associated with  
27 frequent attendance in primary care. *Psychol Med*. 1999;29(6):1347-1357.  
28  
29  
30  
31 23. Frostholm L, Fink P, Christensen KS, et al. The patients' illness perceptions and the use of primary  
32 health care. *Psychosom Med*. 2005;67(6):997-1005.  
33  
34  
35  
36  
37 24. Gawronski KA, Kim ES, Miller LE. Potentially traumatic events and serious life stressors are  
38 prospectively associated with frequency of doctor visits and overnight hospital visits. *J Psychosom Res*.  
39 2014;77(2):90-96.  
40  
41  
42  
43  
44  
45 25. Smits FT, Brouwer HJ, Zwiderman AH, et al. Why do they keep coming back? Psychosocial etiology  
46 of persistence of frequent attendance in primary care: a prospective cohort study. *J Psychosom Res*.  
47 2014;77(6):492-503.  
48  
49  
50  
51  
52  
53 26. Gili M, Sese A, Bauza N, et al. Mental disorders, chronic conditions and psychological factors: a path  
54 analysis model for healthcare consumption in general practice. *Int Rev Psychiatry*. 2011;23(1):20-27.  
55  
56  
57  
58  
59  
60

- 1  
2  
3 27. van Oostrom SH, Picavet HS, de Bruin SR, et al. Multimorbidity of chronic diseases and health care  
4 utilization in general practice. *BMC Fam Pract*. 2014;15:61-2296-15-61.  
5  
6  
7  
8  
9 28. van den Bussche H, Schon G, Kolonko T, et al. Patterns of ambulatory medical care utilization in  
10 elderly patients with special reference to chronic diseases and multimorbidity - results from a claims  
11 data based observational study in Germany. *BMC Geriatr*. 2011;11:54-2318-11-54.  
12  
13  
14  
15  
16 29. Westert GP, Satariano WA, Schellevis FG, van den Bos GA. Patterns of comorbidity and the use of  
17 health services in the Dutch population. *Eur J Public Health*. 2001;11(4):365-372.  
18  
19  
20  
21  
22 30. National Institute for Health and Care Excellence. Depression in adults: Recognition and  
23 management. <https://www.nice.org.uk/guidance/cg90/>. Published April 2016. Updated 2016. Accessed  
24 15 November 2016.  
25  
26  
27  
28  
29  
30 31. Danish Health Authority. NATIONAL CLINICAL GUIDELINE FOR THE NONPHARMACOLOGICAL  
31 TREATMENT OF UNIPOLAR DEPRESSION quick guide.  
32  
33 [http://sundhedsstyrelsen.dk/da/udgivelser/2016/~/\\_media/A535E69EE4994F7BA1170A70156C401D.ash](http://sundhedsstyrelsen.dk/da/udgivelser/2016/~/_media/A535E69EE4994F7BA1170A70156C401D.ashx)  
34 [x](http://sundhedsstyrelsen.dk/da/udgivelser/2016/~/_media/A535E69EE4994F7BA1170A70156C401D.ashx). Published July 2016. Updated 2016. Accessed 15 November 2016.  
35  
36  
37  
38  
39  
40 40 32. Keizer E, Maassen I, Smits M, Wensing M, Giesen P. Reducing the use of out-of-hours primary care  
41 services: A survey among Dutch general practitioners. *Eur J Gen Pract*. 2016;22(3):189-195.  
42  
43  
44  
45  
46 46 33. Jani B, Bikker AP, Higgins M, et al. Patient centredness and the outcome of primary care  
47 consultations with patients with depression in areas of high and low socioeconomic deprivation. *Br J*  
48 *Gen Pract*. 2012;62(601):e576-81.  
49  
50  
51  
52  
53  
54  
55  
56  
57  
58  
59  
60

1  
2  
3 34. Mercer SW, Fitzpatrick B, Guthrie B, et al. The CARE plus study - a whole-system intervention to  
4 improve quality of life of primary care patients with multimorbidity in areas of high socioeconomic  
5 deprivation: Exploratory cluster randomised controlled trial and cost-utility analysis. *BMC Med*.  
6  
7 2016;14(1):88-016-0634-2.  
8  
9

10  
11  
12  
13 35. Bohlmeijer E, Prenger R, Taal E, Cuijpers P. The effects of mindfulness-based stress reduction therapy  
14 on mental health of adults with a chronic medical disease: A meta-analysis. *J Psychosom Res*.  
15  
16 2010;68(6):539-544.  
17  
18

19  
20  
21 36. Katon WJ, Lin EH, Von Korff M, et al. Collaborative care for patients with depression and chronic  
22 illnesses. *N Engl J Med*. 2010;363(27):2611-2620.  
23  
24

25  
26  
27 37. Coventry P, Lovell K, Dickens C, et al. Integrated primary care for patients with mental and physical  
28 multimorbidity: Cluster randomised controlled trial of collaborative care for patients with depression  
29 comorbid with diabetes or cardiovascular disease. *BMJ*. 2015;350:h638. doi: 10.1136/bmj.h638.  
30  
31  
32  
33  
34  
35  
36  
37  
38  
39  
40  
41  
42  
43  
44  
45  
46  
47  
48  
49  
50  
51  
52  
53  
54  
55  
56  
57  
58  
59  
60

1  
2  
3  
4  
5  
6  
7  
8  
9  
10  
11  
12  
13  
14  
15  
16  
17  
18  
19  
20  
21  
22  
23  
24  
25  
26  
27  
28  
29  
30  
31  
32  
33  
34  
35  
36  
37  
38  
39  
40  
41  
42  
43  
44  
45  
46  
47  
48  
49  
50  
51  
52  
53  
54  
55  
56  
57  
58  
59  
60

**Tables and figures**

For peer review only

**Table 1. Study population characteristics according to Perceived Stress Scale quintile.**

| Characteristics           | Total<br>Number | Total<br>Col % | PSS quintile |             |             |             |             |
|---------------------------|-----------------|----------------|--------------|-------------|-------------|-------------|-------------|
|                           |                 |                | 1<br>Row %   | 2<br>Row %  | 3<br>Row %  | 4<br>Row %  | 5<br>Row %  |
| Median PSS score (range)  |                 |                | 4 (0–6)      | 9 (7–10)    | 12 (11–13)  | 15 (14–17)  | 21 (18–40)  |
| Age groups, years         |                 |                |              |             |             |             |             |
| 25-34                     | 13,881          | 11.7           | 23.2         | 24.9        | 23.6        | 14.1        | 14.2        |
| 35-44                     | 22,673          | 19.1           | 26.7         | 25.4        | 22.0        | 13.2        | 12.7        |
| 45-54                     | 25,272          | 21.3           | 28.5         | 25.0        | 21.1        | 12.8        | 12.6        |
| 55-64                     | 26,610          | 22.5           | 31.1         | 24.6        | 20.6        | 12.8        | 11.0        |
| 65-74                     | 19,982          | 16.9           | 31.1         | 23.5        | 20.6        | 14.7        | 10.0        |
| ≥75                       | 9,992           | 8.4            | 20.8         | 19.6        | 21.8        | 20.1        | 17.7        |
| Sex                       |                 |                |              |             |             |             |             |
| Men                       | 54,968          | 46.4           | 26.1         | 24.8        | 17.7        | 16.5        | 14.8        |
| Women                     | 63,442          | 53.6           | 19.4         | 22.3        | 18.1        | 19.0        | 21.2        |
| Number of conditions      |                 |                |              |             |             |             |             |
| 0                         | 58,718          | 49.6           | 25.6         | 26.3        | 18.9        | 16.5        | 12.7        |
| 1                         | 2,5755          | 21.8           | 22.2         | 22.9        | 17.8        | 18.1        | 18.9        |
| 2                         | 14,677          | 12.4           | 21.1         | 21.5        | 17.3        | 18.6        | 21.6        |
| ≥3                        | 19,260          | 16.3           | 14.6         | 17.2        | 15.6        | 20.8        | 31.7        |
| Any psychiatric condition |                 |                |              |             |             |             |             |
| No                        | 109,137         | 92.2           | 23.8         | 24.6        | 18.4        | 17.7        | 15.5        |
| Yes                       | 9,273           | 7.8            | 7.3          | 10.9        | 12.3        | 19.5        | 50.0        |
| <b>Total</b>              | <b>118,410</b>  | <b>100.0</b>   | <b>22.5</b>  | <b>23.5</b> | <b>18.0</b> | <b>17.8</b> | <b>18.2</b> |

PSS: Perceived Stress Scale



**Table 2. Cumulative incidence proportions and incidence rate ratios of mental health related primary care activities according to Perceived Stress Scale quintile.**

| Primary care service          | PSS quintile | CIP <sub>1y</sub> (%) | 95% CI      | IR   | Crude IRR | Adj. IRR* | 95% CI       |
|-------------------------------|--------------|-----------------------|-------------|------|-----------|-----------|--------------|
| Talk therapy by GP            | 1            | 1.1                   | (1.0,1.2)   | 0.02 | 1         | 1         | Reference    |
|                               | 2            | 1.7                   | (1.5,1.8)   | 0.03 | 1.48      | 1.38      | (1.15,1.65)  |
|                               | 3            | 2.2                   | (2.0,2.4)   | 0.04 | 2.01      | 1.72      | (1.43,2.06)  |
|                               | 4            | 3.1                   | (2.9,3.3)   | 0.06 | 2.76      | 2.38      | (1.99,2.83)  |
|                               | 5            | 6.8                   | (6.5,7.2)   | 0.15 | 6.90      | 4.96      | (4.20,5.86)  |
| Psychometric tests            | 1            | 1.2                   | (1.1,1.3)   | 0.02 | 1         | 1         | Reference    |
|                               | 2            | 1.8                   | (1.6,1.9)   | 0.02 | 1.38      | 1.26      | (1.06,1.51)  |
|                               | 3            | 2.5                   | (2.3,2.7)   | 0.04 | 2.04      | 1.75      | (1.46,2.10)  |
|                               | 4            | 3.2                   | (2.9,3.4)   | 0.05 | 2.82      | 2.16      | (1.82,2.56)  |
|                               | 5            | 6.6                   | (6.2,6.9)   | 0.10 | 5.96      | 3.68      | (3.11,4.35)  |
| Psychologist services         | 1            | 0.4                   | (0.4,0.5)   | 0.02 | 1         | 1         | Reference    |
|                               | 2            | 0.7                   | (0.6,0.8)   | 0.04 | 1.57      | 1.49      | (1.08,2.05)  |
|                               | 3            | 1.2                   | (1.0,1.3)   | 0.06 | 2.54      | 1.99      | (1.47,2.69)  |
|                               | 4            | 1.5                   | (1.4,1.7)   | 0.08 | 3.53      | 3.07      | (2.26,4.16)  |
|                               | 5            | 3.3                   | (3.1,3.6)   | 0.21 | 8.69      | 6.49      | (4.90,8.58)  |
| Psychiatrist services         | 1            | 0.2                   | (0.1,0.3)   | 0.01 | 1         | 1         | Reference    |
|                               | 2            | 0.3                   | (0.3,0.4)   | 0.02 | 2.17      | 1.96      | (1.16,3.32)  |
|                               | 3            | 0.5                   | (0.4,0.6)   | 0.03 | 3.20      | 1.92      | (1.07,3.46)  |
|                               | 4            | 0.9                   | (0.8,1.0)   | 0.06 | 6.86      | 4.61      | (2.77,7.69)  |
|                               | 5            | 3.7                   | (3.4,4.0)   | 0.24 | 28.74     | 13.26     | (8.33,21.09) |
| Antidepressants prescriptions | 1            | 2.6                   | (2.4,2.8)   | 0.10 | 1         | 1         | Reference    |
|                               | 2            | 3.7                   | (3.5,3.9)   | 0.16 | 1.55      | 1.28      | (1.09,1.49)  |
|                               | 3            | 5.7                   | (5.4,6.0)   | 0.25 | 2.37      | 1.84      | (1.58,2.16)  |
|                               | 4            | 8.6                   | (8.2,9.0)   | 0.40 | 3.85      | 2.35      | (2.04,2.71)  |
|                               | 5            | 21.5                  | (20.9,22.0) | 1.21 | 11.63     | 4.62      | (4.03,5.31)  |
| Anxiolytics prescriptions     | 1            | 1.5                   | (1.4,1.7)   | 0.03 | 1         | 1         | Reference    |
|                               | 2            | 2.0                   | (1.8,2.2)   | 0.05 | 1.61      | 1.53      | (1.29,1.83)  |
|                               | 3            | 2.8                   | (2.6,3.0)   | 0.08 | 2.59      | 2.02      | (1.67,2.44)  |
|                               | 4            | 4.1                   | (3.8,4.4)   | 0.13 | 4.27      | 2.56      | (2.16,3.03)  |
|                               | 5            | 9.4                   | (9.0,9.8)   | 0.46 | 14.52     | 4.73      | (4.03,5.54)  |
| Hypnotics prescriptions       | 1            | 3.4                   | (3.2,3.6)   | 0.08 | 1         | 1         | Reference    |
|                               | 2            | 4.3                   | (4.0,4.5)   | 0.11 | 1.39      | 1.34      | (1.18,1.51)  |
|                               | 3            | 5.3                   | (5.0,5.6)   | 0.16 | 2.03      | 1.67      | (1.47,1.89)  |
|                               | 4            | 6.6                   | (6.3,7.0)   | 0.22 | 2.77      | 1.83      | (1.61,2.07)  |
|                               | 5            | 11.0                  | (10.6,11.5) | 0.5  | 6.32      | 2.93      | (2.59,3.31)  |

PSS: Perceived Stress Scale. CI: Confidence interval. CIP<sub>1y</sub>: Cumulative incidence proportion at one year (in %). IR: Incidence rate. IRR: Incidence rate ratio.

\*: adjusted for sex, age as 10-year age bands, presence of each of the 39 psychiatric and physical conditions in the multimorbidity index, socioeconomic factors, and lifestyle on index date.

**Table 3. Cumulative incidence proportions and incidence rate ratios of general primary care and chronic care services according to Perceived Stress Scale quintile.**

| Primary care service              | PSS      |                       | 95% CI      | IR   | Crude IRR | Adj. |             |
|-----------------------------------|----------|-----------------------|-------------|------|-----------|------|-------------|
|                                   | quintile | CIP <sub>1y</sub> (%) |             |      |           | IRR* | 95% CI      |
| Spirometries                      | 1        | 2.6                   | (2.4,2.8)   | 0.03 | 1         | 1    | Reference   |
|                                   | 2        | 3.0                   | (2.8,3.2)   | 0.04 | 1.15      | 1.12 | (1.00,1.25) |
|                                   | 3        | 3.0                   | (2.8,3.3)   | 0.04 | 1.14      | 1.06 | (0.94,1.19) |
|                                   | 4        | 3.6                   | (3.4,3.9)   | 0.05 | 1.40      | 1.17 | (1.04,1.32) |
|                                   | 5        | 4.4                   | (4.1,4.6)   | 0.06 | 1.67      | 1.16 | (1.03,1.31) |
| Blood sugar measures              | 1        | 13.9                  | (13.5,14.3) | 0.21 | 1         | 1    | Reference   |
|                                   | 2        | 13.7                  | (13.3,14.1) | 0.21 | 1.02      | 1.02 | (0.97,1.07) |
|                                   | 3        | 14.7                  | (14.2,15.2) | 0.23 | 1.08      | 1.05 | (0.99,1.10) |
|                                   | 4        | 16.3                  | (15.8,16.8) | 0.27 | 1.26      | 1.09 | (1.04,1.15) |
|                                   | 5        | 18.4                  | (17.8,18.9) | 0.3  | 1.44      | 1.12 | (1.06,1.18) |
| ECGs                              | 1        | 7.4                   | (7.1,7.7)   | 0.08 | 1         | 1    | Reference   |
|                                   | 2        | 7.7                   | (7.4,8.0)   | 0.09 | 1.03      | 1.05 | (0.99,1.12) |
|                                   | 3        | 8.0                   | (7.6,8.4)   | 0.09 | 1.10      | 1.08 | (1.02,1.16) |
|                                   | 4        | 9.2                   | (8.9,9.6)   | 0.11 | 1.29      | 1.17 | (1.09,1.25) |
|                                   | 5        | 9.6                   | (9.3,10.1)  | 0.11 | 1.32      | 1.14 | (1.07,1.22) |
| Home blood pressure measures      | 1        | 5.2                   | (4.9,5.5)   | 0.07 | 1         | 1    | Reference   |
|                                   | 2        | 5.2                   | (5.0,5.5)   | 0.07 | 0.99      | 1.05 | (0.96,1.14) |
|                                   | 3        | 5.3                   | (5.0,5.6)   | 0.07 | 1.01      | 1.04 | (0.95,1.14) |
|                                   | 4        | 5.6                   | (5.3,6.0)   | 0.08 | 1.11      | 1.10 | (1.00,1.20) |
|                                   | 5        | 5.2                   | (4.9,5.5)   | 0.07 | 0.97      | 1.02 | (0.93,1.13) |
| Annual chronic care consultations | 1        | 18.1                  | (17.6,18.5) | 0.31 | 1         | 1    | Reference   |
|                                   | 2        | 17.9                  | (17.5,18.4) | 0.31 | 1.01      | 1.02 | (0.97,1.06) |
|                                   | 3        | 18.7                  | (18.2,19.2) | 0.33 | 1.09      | 1.04 | (0.99,1.10) |
|                                   | 4        | 21.0                  | (20.4,21.5) | 0.39 | 1.27      | 1.09 | (1.04,1.14) |
|                                   | 5        | 23.8                  | (23.2,24.4) | 0.47 | 1.53      | 1.22 | (1.16,1.29) |
| Out-of-hours contacts             | 1        | 14.2                  | (13.8,14.7) | 0.21 | 1         | 1    | Reference   |
|                                   | 2        | 16.1                  | (15.7,16.5) | 0.25 | 1.16      | 1.07 | (1.02,1.13) |
|                                   | 3        | 17.4                  | (16.9,18.0) | 0.28 | 1.32      | 1.13 | (1.07,1.19) |
|                                   | 4        | 19.7                  | (19.1,20.2) | 0.33 | 1.57      | 1.22 | (1.16,1.29) |
|                                   | 5        | 26.1                  | (25.6,26.7) | 0.54 | 2.57      | 1.47 | (1.39,1.55) |
| Daytime consultations             | 1        | 77.4                  | (76.9,77.9) | 3.22 | 1         | 1    | Reference   |
|                                   | 2        | 79.9                  | (79.4,80.4) | 3.46 | 1.07      | 1.04 | (1.02,1.06) |
|                                   | 3        | 82.1                  | (81.6,82.6) | 3.82 | 1.18      | 1.10 | (1.07,1.12) |
|                                   | 4        | 84.7                  | (84.2,85.2) | 4.45 | 1.38      | 1.18 | (1.16,1.20) |
|                                   | 5        | 88.7                  | (88.3,89.2) | 5.5  | 1.71      | 1.28 | (1.25,1.30) |

PSS: Perceived Stress Scale. CI: Confidence interval. CIP<sub>1y</sub>: Cumulative incidence proportion at one year (in %). IR: Incidence rate. IRR: Incidence rate ratio.

\*: adjusted for sex, age as 10-year age bands, presence of each of the 39 psychiatric and physical conditions in the multimorbidity index, socioeconomic factors, and lifestyle on index date.

**Figure 1. Cumulative incidence proportions and incidence rate ratios of mental health related primary care services according to Perceived Stress Scale quintile and number of physical conditions.**

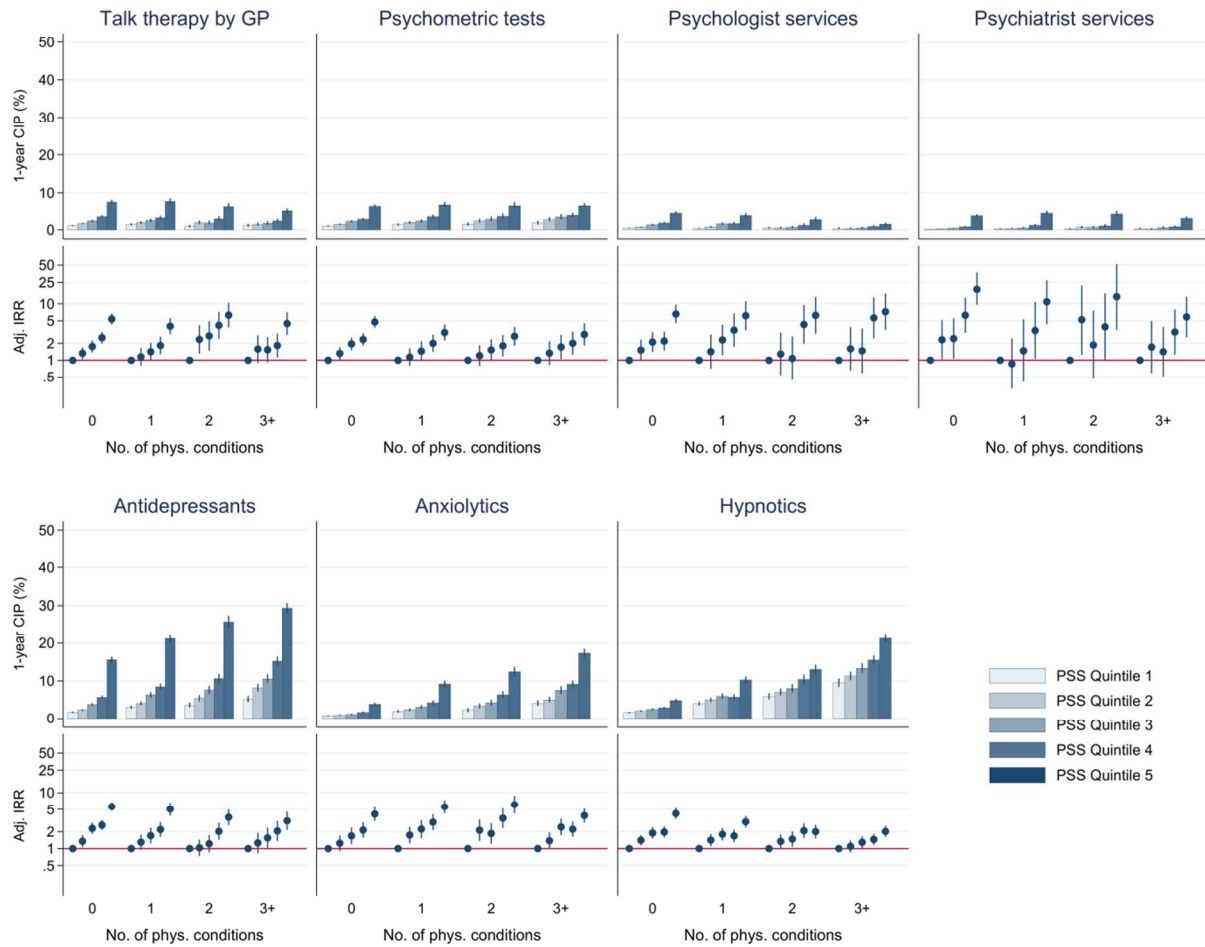

**Figure 2. Cumulative incidence proportions and incidence rate ratios of general primary care and chronic care services according to Perceived Stress Scale quintile and number of physical conditions.**

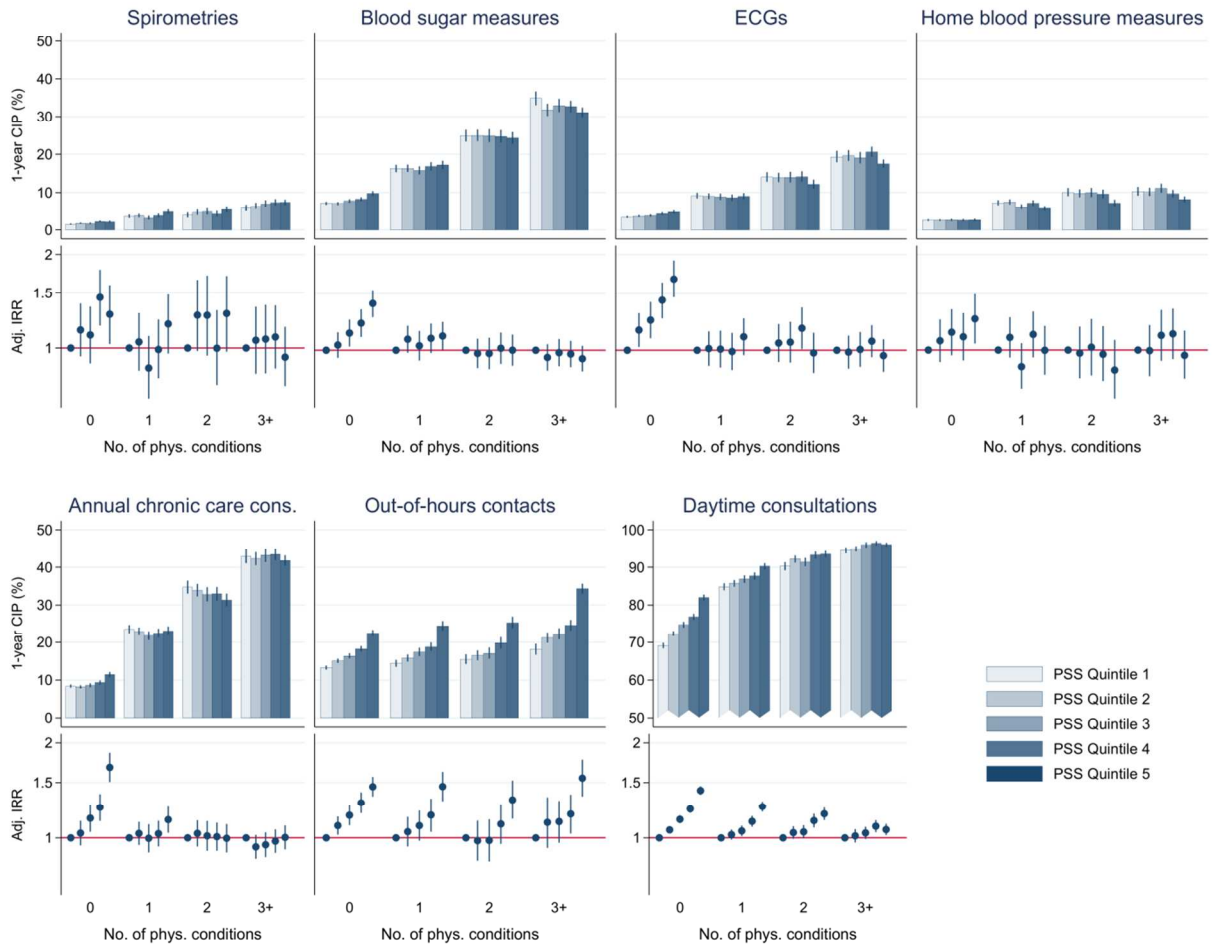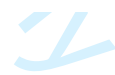

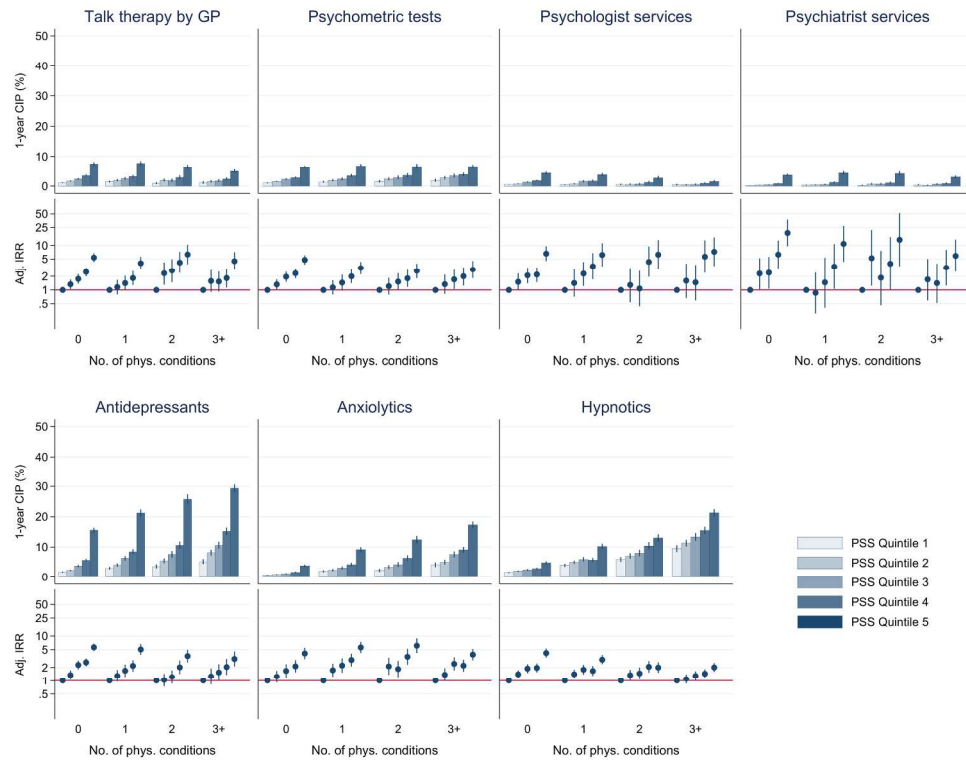

Cumulative incidence proportions and incidence rate ratios of mental health related primary care services according to Perceived Stress Scale quintile and number of physical conditions.

228x187mm (300 x 300 DPI)

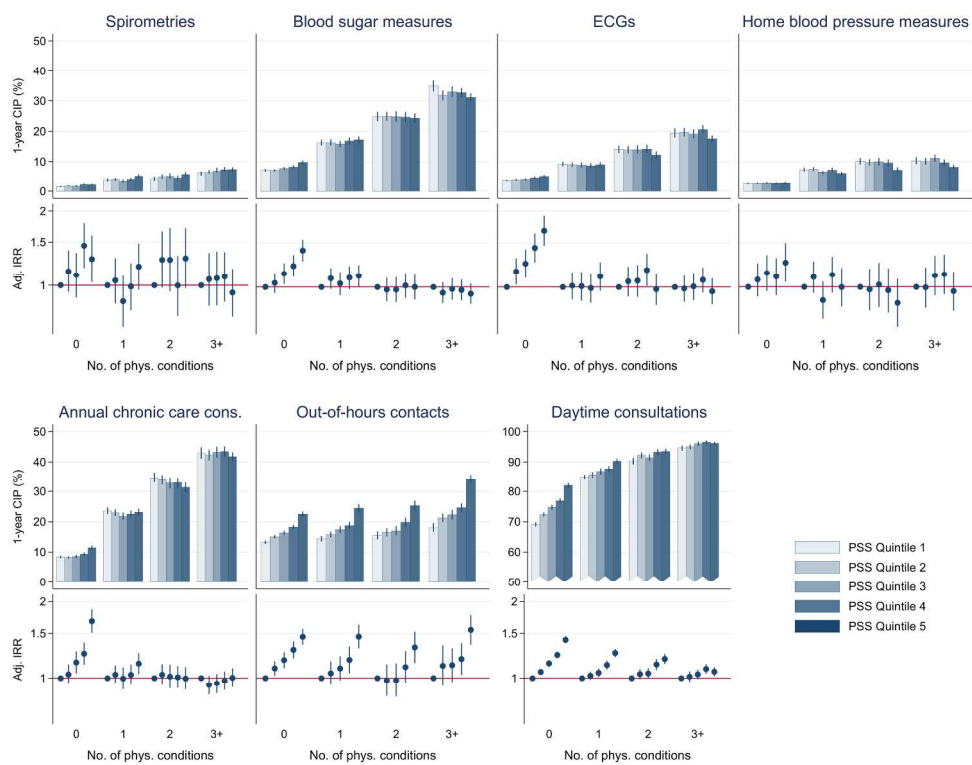

Cumulative incidence proportions and incidence rate ratios of general primary care and chronic care services according to Perceived Stress Scale quintile and number of physical conditions.

228x187mm (300 x 300 DPI)

Only

## Supplemental file

### Perceived stress, multimorbidity, and use of primary care health services

eTable 1. Multimorbidity index diseases

eTable 2. Classification codes for services and prescriptions

eTable 3. Incidence rate ratios of primary care services according to Perceived Stress Scale quintile for persons without psychiatric illness (N=109,137)

eTable 4. Incidence rate ratios for primary care activities requested by non-respondents versus respondents

eTable 5. Incidence rate ratios for general primary care services in persons with any psychiatric condition versus persons without psychiatric conditions according to survey response status

**eTable 1. Multimorbidity index diseases**

| Category                     | Disease group                              |
|------------------------------|--------------------------------------------|
| Circulatory system           | Hypertension                               |
|                              | Dyslipidemia                               |
|                              | Ischemic heart disease                     |
|                              | Atrial fibrillation                        |
|                              | Heart failure                              |
|                              | Peripheral artery occlusive disease        |
| Endocrine system             | Stroke                                     |
|                              | Diabetes mellitus                          |
|                              | Thyroid disorder                           |
| Pulmonary system and allergy | Gout                                       |
|                              | Chronic pulmonary disease                  |
| Gastrointestinal system      | Allergy                                    |
|                              | Ulcer/chronic gastritis                    |
|                              | Chronic liver disease                      |
|                              | Inflammatory bowel disease                 |
| Urogenital system            | Diverticular disease of intestine          |
|                              | Chronic kidney disease                     |
|                              | Prostate disorders                         |
| Musculoskeletal system       | Connective tissue disorders                |
|                              | Osteoporosis                               |
|                              | Painful condition                          |
| Haematological system        | Anaemias                                   |
|                              | HIV/AIDS                                   |
| Cancers                      | Cancer                                     |
| Neurological system          | Vision problem                             |
|                              | Hearing problem                            |
|                              | Migraine                                   |
|                              | Epilepsy                                   |
|                              | Parkinson's disease                        |
|                              | Multiple sclerosis                         |
|                              | Neuropathies                               |
| Mental health conditions     | Mood, stress-related, or anxiety disorders |
|                              | Psychological distress                     |
|                              | Alcohol problems                           |
|                              | Substance abuse                            |
|                              | Anorexia/bulimia                           |
|                              | Bipolar affective disorder                 |
|                              | Schizophrenia or schizoaffective disorder  |
|                              | Dementia                                   |

HIV: human immunodeficiency virus; AIDS: acquired immunodeficiency syndrome.

<sup>a</sup>For details and coding definitions, please see Prior A, Fenger-Grøn M, Larsen KK, et al. The association between perceived stress and mortality among people with multimorbidity: A prospective population-based cohort study. *Am J Epidemiol* 2016;184:199-210.



**eTable 2. Classification codes for services and prescriptions**

| Outcome                                                       | Danish National Health Service Register service codes*       | ATC prescription codes                                  |
|---------------------------------------------------------------|--------------------------------------------------------------|---------------------------------------------------------|
| Talk therapy by GP                                            | 4003, 4021-4027, 4050, 4063, 4106, 4247-4249, 6101 (daytime) |                                                         |
| Psychometric tests                                            | 2149 (daytime)                                               |                                                         |
| Psychologist services                                         | 0100-0299, 1000-3999 (daytime)                               |                                                         |
| Psychiatrist services                                         | 0110-0140, 0210-0236 (daytime)                               |                                                         |
| Antidepressant prescriptions                                  |                                                              | N06AB, N06AF, N06AG, N06AX (N06AX12 & N06AX05 excluded) |
| Anxiolytics prescriptions                                     |                                                              | N05BA, N05BE                                            |
| Hypnotics prescriptions                                       |                                                              | N05CD, N05CF, N05CH                                     |
| Daytime consultations                                         | 0101 (daytime)                                               |                                                         |
| Out-of-hours contacts (telephone, consultations, home visits) | 0501, 0602, 04XX (out-of-hours)                              |                                                         |
| Annual chronic care consultations                             | 0106, 0120 (daytime)                                         |                                                         |
| Spirometries                                                  | 7113 (daytime)                                               |                                                         |
| Blood sugar measures                                          | 7136 (daytime)                                               |                                                         |
| ECGs                                                          | 7156 (daytime)                                               |                                                         |
| Home blood pressure measures                                  | 2146 (daytime)                                               |                                                         |

ATC: Anatomical Therapeutic Chemical classification.

\* Provider specialty is general practice (codes 80-89), except for psychologists services (code 63) and psychiatrist services (code 24).

**eTable 3. Incidence rate ratios of primary care services according to Perceived Stress Scale quintile for persons without psychiatric illness (N=109,137)**

| Activity                      | PSS quintile | Adj. IRR* | 95% CI        | Activity                         | PSS quintile | Adj. IRR* | 95% CI      |
|-------------------------------|--------------|-----------|---------------|----------------------------------|--------------|-----------|-------------|
| Talk therapy by GP            | 1            | 1         | Reference     | Spirometries                     | 1            | 1         | Reference   |
|                               | 2            | 1.36      | (1.12,1.66)   |                                  | 2            | 1.10      | (0.98,1.24) |
|                               | 3            | 1.61      | (1.32,1.96)   |                                  | 3            | 1.07      | (0.94,1.21) |
|                               | 4            | 2.39      | (1.98,2.89)   |                                  | 4            | 1.15      | (1.01,1.30) |
|                               | 5            | 5.22      | (4.36,6.26)   |                                  | 5            | 1.16      | (1.01,1.32) |
| Psychometric tests            | 1            | 1         | Reference     | Blood sugar measures             | 1            | 1         | Reference   |
|                               | 2            | 1.26      | (1.05,1.52)   |                                  | 2            | 1.03      | (0.98,1.08) |
|                               | 3            | 1.78      | (1.47,2.16)   |                                  | 3            | 1.06      | (1.00,1.11) |
|                               | 4            | 2.14      | (1.78,2.58)   |                                  | 4            | 1.09      | (1.04,1.16) |
|                               | 5            | 3.99      | (3.33,4.78)   |                                  | 5            | 1.12      | (1.06,1.19) |
| Psychologist services         | 1            | 1         | Reference     | ECGs                             | 1            | 1         | Reference   |
|                               | 2            | 1.53      | (1.09,2.15)   |                                  | 2            | 1.05      | (0.99,1.12) |
|                               | 3            | 1.97      | (1.43,2.72)   |                                  | 3            | 1.08      | (1.01,1.16) |
|                               | 4            | 3.05      | (2.21,4.23)   |                                  | 4            | 1.16      | (1.09,1.24) |
|                               | 5            | 6.83      | (5.05,9.23)   |                                  | 5            | 1.15      | (1.07,1.24) |
| Psychiatrist services         | 1            | 1         | Reference     | Home blood pressure measures     | 1            | 1         | Reference   |
|                               | 2            | 2.17      | (1.12,4.19)   |                                  | 2            | 1.06      | (0.97,1.15) |
|                               | 3            | 2.32      | (1.14,4.71)   |                                  | 3            | 1.04      | (0.95,1.14) |
|                               | 4            | 5.69      | (3.08,10.52)  |                                  | 4            | 1.09      | (1.00,1.20) |
|                               | 5            | 25.45     | (14.54,44.54) |                                  | 5            | 1.04      | (0.93,1.15) |
| Antidepressants prescriptions | 1            | 1         | Reference     | Annual chronic care consultation | 1            | 1         | Reference   |
|                               | 2            | 1.30      | (1.04,1.63)   |                                  | 2            | 1.03      | (0.98,1.07) |
|                               | 3            | 2.22      | (1.78,2.76)   |                                  | 3            | 1.05      | (1.00,1.11) |
|                               | 4            | 2.84      | (2.31,3.50)   |                                  | 4            | 1.09      | (1.04,1.15) |
|                               | 5            | 6.79      | (5.59,8.25)   |                                  | 5            | 1.24      | (1.17,1.31) |
| Anxiolytics prescriptions     | 1            | 1         | Reference     | Out-of-hours contacts            | 1            | 1         | Reference   |
|                               | 2            | 1.54      | (1.27,1.87)   |                                  | 2            | 1.07      | (1.01,1.13) |
|                               | 3            | 2.07      | (1.69,2.55)   |                                  | 3            | 1.13      | (1.07,1.19) |
|                               | 4            | 2.67      | (2.21,3.24)   |                                  | 4            | 1.23      | (1.16,1.30) |
|                               | 5            | 5.01      | (4.18,6.00)   |                                  | 5            | 1.47      | (1.39,1.55) |
| Hypnotics prescriptions       | 1            | 1         | Reference     | Daytime consultations            | 1            | 1         | Reference   |
|                               | 2            | 1.33      | (1.17,1.51)   |                                  | 2            | 1.04      | (1.02,1.06) |
|                               | 3            | 1.61      | (1.41,1.84)   |                                  | 3            | 1.09      | (1.07,1.12) |
|                               | 4            | 1.86      | (1.63,2.12)   |                                  | 4            | 1.17      | (1.14,1.19) |
|                               | 5            | 2.96      | (2.59,3.38)   |                                  | 5            | 1.28      | (1.25,1.31) |

PSS: Perceived Stress Scale. IRR: Incidence rate ratio.

\*: adjusted for sex, age as 10-year age bands, presence of each of the 39 psychiatric and physical conditions in the multimorbidity index, socioeconomic factors, and lifestyle on index date.

**eTable 4. Incidence rate ratios for primary care activities requested by non-respondents versus respondents**

| Activity                         | Non-respondent |             | Non-respondent adjusted |             |
|----------------------------------|----------------|-------------|-------------------------|-------------|
|                                  | crude IRR      | 95% CI      | IRR*                    | 95% CI      |
| Talk therapy by GP               | 1.18           | (1.11,1.25) | 1.23                    | (1.15,1.31) |
| Psychometric tests               | 1.20           | (1.13,1.27) | 1.14                    | (1.07,1.22) |
| Psychologist services            | 0.93           | (0.85,1.02) | 0.95                    | (0.83,1.09) |
| Psychiatrist services            | 1.32           | (1.20,1.46) | 1.46                    | (1.23,1.73) |
| Antidepressant prescriptions     | 1.96           | (1.88,2.03) | 1.46                    | (1.37,1.56) |
| Anxiolytics prescriptions        | 2.34           | (2.20,2.48) | 1.93                    | (1.78,2.09) |
| Hypnotics prescriptions          | 1.70           | (1.62,1.79) | 1.38                    | (1.30,1.47) |
| Spirometries                     | 0.86           | (0.81,0.91) | 0.94                    | (0.88,0.99) |
| Blood sugar measures             | 0.94           | (0.91,0.96) | 0.97                    | (0.95,1.00) |
| ECGs                             | 0.82           | (0.79,0.85) | 0.88                    | (0.86,0.91) |
| Home blood pressure measures     | 0.74           | (0.70,0.77) | 0.88                    | (0.84,0.93) |
| Annual chronic care consultation | 0.88           | (0.86,0.90) | 0.93                    | (0.91,0.96) |
| Out-of-hours contacts            | 1.59           | (1.51,1.68) | 1.20                    | (1.17,1.23) |
| Daytime consultations            | 0.94           | (0.93,0.95) | 0.95                    | (0.94,0.96) |

IRR: Incidence rate ratios.

\*: IRRs adjusted for sex, age as 10-year age bands, presence of each of the 39 psychiatric and physical conditions in the multimorbidity index, cohabitation status, and educational level on index date.

The reference for each activity is survey respondents.

**eTable 5. Incidence rate ratios for general primary care services in persons with any psychiatric condition versus persons without psychiatric conditions according to survey response status**

| Activity                         | Any psychiatric condition | Respondents |             | Non-respondents |             |
|----------------------------------|---------------------------|-------------|-------------|-----------------|-------------|
|                                  |                           | Adj. IRR    | 95% CI      | Adj. IRR        | 95% CI      |
| Annual chronic care consultation | No                        | 1           | Reference   | 1               | Reference   |
|                                  | Yes                       | 1.39        | (1.15,1.68) | 1.26            | (1.04,1.53) |
| Out-of-hours contacts            | No                        | 1           | Reference   | 1               | Reference   |
|                                  | Yes                       | 1.77        | (1.43,2.18) | 1.85            | (1.50,2.28) |
| Daytime consultations            | No                        | 1           | Reference   | 1               | Reference   |
|                                  | Yes                       | 1.35        | (1.24,1.48) | 1.33            | (1.21,1.45) |

IRR: Incidence rate ratios.

\*: IRRs adjusted for sex, age as 10-year age bands, presence of each of the 39 psychiatric and physical conditions in the multimorbidity index, cohabitation status and educational level on index date.

## STROBE Statement—checklist of items that should be included in reports of observational studies

|                              | Item No | Recommendation                                                                                                                                                                                                                                                                                                                                                                                                                                                         | Described on page            |
|------------------------------|---------|------------------------------------------------------------------------------------------------------------------------------------------------------------------------------------------------------------------------------------------------------------------------------------------------------------------------------------------------------------------------------------------------------------------------------------------------------------------------|------------------------------|
| <b>Title and abstract</b>    | 1       | (a) Indicate the study's design with a commonly used term in the title or the abstract                                                                                                                                                                                                                                                                                                                                                                                 | 1–2                          |
|                              |         | (b) Provide in the abstract an informative and balanced summary of what was done and what was found                                                                                                                                                                                                                                                                                                                                                                    | 2–3                          |
| <b>Introduction</b>          |         |                                                                                                                                                                                                                                                                                                                                                                                                                                                                        |                              |
| Background/rationale         | 2       | Explain the scientific background and rationale for the investigation being reported                                                                                                                                                                                                                                                                                                                                                                                   | 5                            |
| Objectives                   | 3       | State specific objectives, including any prespecified hypotheses                                                                                                                                                                                                                                                                                                                                                                                                       | 5                            |
| <b>Methods</b>               |         |                                                                                                                                                                                                                                                                                                                                                                                                                                                                        |                              |
| Study design                 | 4       | Present key elements of study design early in the paper                                                                                                                                                                                                                                                                                                                                                                                                                | 5                            |
| Setting                      | 5       | Describe the setting, locations, and relevant dates, including periods of recruitment, exposure, follow-up, and data collection                                                                                                                                                                                                                                                                                                                                        | 5–7                          |
| Participants                 | 6       | (a) <i>Cohort study</i> —Give the eligibility criteria, and the sources and methods of selection of participants. Describe methods of follow-up<br><i>Case-control study</i> —Give the eligibility criteria, and the sources and methods of case ascertainment and control selection. Give the rationale for the choice of cases and controls<br><i>Cross-sectional study</i> —Give the eligibility criteria, and the sources and methods of selection of participants | 5–6                          |
|                              |         | (b) <i>Cohort study</i> —For matched studies, give matching criteria and number of exposed and unexposed<br><i>Case-control study</i> —For matched studies, give matching criteria and the number of controls per case                                                                                                                                                                                                                                                 |                              |
| Variables                    | 7       | Clearly define all outcomes, exposures, predictors, potential confounders, and effect modifiers. Give diagnostic criteria, if applicable                                                                                                                                                                                                                                                                                                                               | 5–7,<br>eTable 1<br>eTable 2 |
| Data sources/<br>measurement | 8*      | For each variable of interest, give sources of data and details of methods of assessment (measurement). Describe comparability of assessment methods if there is more than one group                                                                                                                                                                                                                                                                                   | 6–7,<br>eTable 1<br>eTable 2 |
| Bias                         | 9       | Describe any efforts to address potential sources of bias                                                                                                                                                                                                                                                                                                                                                                                                              | 7–8                          |
| Study size                   | 10      | Explain how the study size was arrived at                                                                                                                                                                                                                                                                                                                                                                                                                              | 5–6                          |
| Quantitative variables       | 11      | Explain how quantitative variables were handled in the analyses. If applicable, describe which groupings were chosen and why                                                                                                                                                                                                                                                                                                                                           | 6–8                          |
| Statistical methods          | 12      | (a) Describe all statistical methods, including those used to control for confounding                                                                                                                                                                                                                                                                                                                                                                                  | 8                            |
|                              |         | (b) Describe any methods used to examine subgroups and interactions                                                                                                                                                                                                                                                                                                                                                                                                    | 8                            |
|                              |         | (c) Explain how missing data were addressed                                                                                                                                                                                                                                                                                                                                                                                                                            | 8                            |
|                              |         | (d) <i>Cohort study</i> —If applicable, explain how loss to follow-up was addressed<br><i>Case-control study</i> —If applicable, explain how matching of cases and controls was addressed<br><i>Cross-sectional study</i> —If applicable, describe analytical methods                                                                                                                                                                                                  | 6–8                          |

|                          |     |                                                                                                                                                                                                              |                                              |
|--------------------------|-----|--------------------------------------------------------------------------------------------------------------------------------------------------------------------------------------------------------------|----------------------------------------------|
|                          |     | taking account of sampling strategy                                                                                                                                                                          |                                              |
|                          |     | (e) Describe any sensitivity analyses                                                                                                                                                                        | 8                                            |
| <b>Results</b>           |     |                                                                                                                                                                                                              |                                              |
| Participants             | 13* | (a) Report numbers of individuals at each stage of study—eg numbers potentially eligible, examined for eligibility, confirmed eligible, included in the study, completing follow-up, and analysed            | 5, 8                                         |
|                          |     | (b) Give reasons for non-participation at each stage                                                                                                                                                         | 5                                            |
|                          |     | (c) Consider use of a flow diagram                                                                                                                                                                           |                                              |
| Descriptive data         | 14* | (a) Give characteristics of study participants (eg demographic, clinical, social) and information on exposures and potential confounders                                                                     | 8, 9, Table 1                                |
|                          |     | (b) Indicate number of participants with missing data for each variable of interest                                                                                                                          | 9                                            |
|                          |     | (c) <i>Cohort study</i> —Summarise follow-up time (eg, average and total amount)                                                                                                                             | 8                                            |
| Outcome data             | 15* | <i>Cohort study</i> —Report numbers of outcome events or summary measures over time                                                                                                                          | 8<br>Table 2–3                               |
|                          |     | <i>Case-control study</i> —Report numbers in each exposure category, or summary measures of exposure                                                                                                         |                                              |
|                          |     | <i>Cross-sectional study</i> —Report numbers of outcome events or summary measures                                                                                                                           |                                              |
| Main results             | 16  | (a) Give unadjusted estimates and, if applicable, confounder-adjusted estimates and their precision (eg, 95% confidence interval). Make clear which confounders were adjusted for and why they were included | 8, 9, Table 2–3                              |
|                          |     | (b) Report category boundaries when continuous variables were categorized                                                                                                                                    | Table 1                                      |
|                          |     | (c) If relevant, consider translating estimates of relative risk into absolute risk for a meaningful time period                                                                                             | Table 2–3                                    |
| Other analyses           | 17  | Report other analyses done—eg analyses of subgroups and interactions, and sensitivity analyses                                                                                                               | 10, Figure 1–2, eTable 3, eTable 4, eTable 5 |
| <b>Discussion</b>        |     |                                                                                                                                                                                                              |                                              |
| Key results              | 18  | Summarise key results with reference to study objectives                                                                                                                                                     | 10                                           |
| Limitations              | 19  | Discuss limitations of the study, taking into account sources of potential bias or imprecision. Discuss both direction and magnitude of any potential bias                                                   | 11–12                                        |
| Interpretation           | 20  | Give a cautious overall interpretation of results considering objectives, limitations, multiplicity of analyses, results from similar studies, and other relevant evidence                                   | 12–14                                        |
| Generalisability         | 21  | Discuss the generalisability (external validity) of the study results                                                                                                                                        | 11, 13                                       |
| <b>Other information</b> |     |                                                                                                                                                                                                              |                                              |
| Funding                  | 22  | Give the source of funding and the role of the funders for the present study and, if applicable, for the original study on which the present article is based                                                | 15                                           |

\*Give information separately for cases and controls in case-control studies and, if applicable, for exposed and unexposed groups in cohort and cross-sectional studies.

**Note:** An Explanation and Elaboration article discusses each checklist item and gives methodological background and published examples of transparent reporting. The STROBE checklist is best used in conjunction with this article (freely available on the Web sites of PLoS Medicine at <http://www.plosmedicine.org/>, Annals of Internal Medicine at

1  
2  
3  
4  
5  
6  
7  
8  
9  
10  
11  
12  
13  
14  
15  
16  
17  
18  
19  
20  
21  
22  
23  
24  
25  
26  
27  
28  
29  
30  
31  
32  
33  
34  
35  
36  
37  
38  
39  
40  
41  
42  
43  
44  
45  
46  
47  
48  
49  
50  
51  
52  
53  
54  
55  
56  
57  
58  
59  
60

<http://www.annals.org/>, and *Epidemiology* at <http://www.epidem.com/>). Information on the STROBE Initiative is available at [www.strobe-statement.org](http://www.strobe-statement.org).

For peer review only

# BMJ Open

## The association between perceived stress, multimorbidity, and primary care health services – a Danish population-based cohort study

|                                 |                                                                                                                                                                                                                                                                                                                                                                                                                                                                                                                                                |
|---------------------------------|------------------------------------------------------------------------------------------------------------------------------------------------------------------------------------------------------------------------------------------------------------------------------------------------------------------------------------------------------------------------------------------------------------------------------------------------------------------------------------------------------------------------------------------------|
| Journal:                        | <i>BMJ Open</i>                                                                                                                                                                                                                                                                                                                                                                                                                                                                                                                                |
| Manuscript ID                   | bmjopen-2017-018323.R1                                                                                                                                                                                                                                                                                                                                                                                                                                                                                                                         |
| Article Type:                   | Research                                                                                                                                                                                                                                                                                                                                                                                                                                                                                                                                       |
| Date Submitted by the Author:   | 06-Dec-2017                                                                                                                                                                                                                                                                                                                                                                                                                                                                                                                                    |
| Complete List of Authors:       | Prior, Anders; Aarhus University, Research Unit for General Practice; Aarhus University, Section for General Medical Practice Vestergaard, Mogens; Aarhus Universitet, Research Unit for General Practice; Aarhus University, Section for General Medical Practice Larsen, Karen; Research Unit for General Practice, Department of Public Health; Aarhus University, Section for General Medical Practice Fenger-Gron, Morten; Aarhus University, Research Unit for General Practice; Aarhus University, Section for General Medical Practice |
| <b>Primary Subject Heading</b>: | General practice / Family practice                                                                                                                                                                                                                                                                                                                                                                                                                                                                                                             |
| Secondary Subject Heading:      | Mental health, Epidemiology                                                                                                                                                                                                                                                                                                                                                                                                                                                                                                                    |
| Keywords:                       | stress, psychological, primary health care, family practice, general practice, comorbidity, practice patterns, physicians'                                                                                                                                                                                                                                                                                                                                                                                                                     |
|                                 |                                                                                                                                                                                                                                                                                                                                                                                                                                                                                                                                                |

SCHOLARONE™  
Manuscripts

only



1  
2  
3 **The association between perceived stress, multimorbidity, and primary care**  
4  
5  
6 **health services – a Danish population-based cohort study**  
7  
8  
9  
10

11  
12 Anders Prior<sup>1</sup>, PhD; Mogens Vestergaard<sup>1</sup>, PhD; Karen Kjær Larsen<sup>1</sup>, PhD; Morten Fenger-Grøn<sup>1</sup>, MSc  
13  
14

15  
16  
17 1. Research Unit for General Practice & Section for General Medical Practice, Department of Public  
18  
19 Health, Aarhus University, Denmark  
20  
21

22  
23  
24 **Correspondence to:** Anders Prior, PhD  
25

26 Research Unit for General Practice & Section for General Medical Practice, Department of Public Health,  
27  
28 Aarhus University, Bartholins Allé 2, DK-8000, Aarhus, Denmark  
29

30 Phone: +45 8716 7948 Fax: +45 8612 4788 Email: anders.prior@ph.au.dk  
31  
32

33  
34 **Word count:** 3,742  
35  
36  
37  
38  
39  
40  
41  
42  
43  
44  
45  
46  
47  
48  
49  
50  
51  
52  
53  
54  
55  
56  
57  
58  
59  
60

## Abstract

### Objectives

Mental stress is common in the general population. Mounting evidence suggests that mental stress is associated with multimorbidity, suboptimal care, and increased mortality. Delivering healthcare in a bio-psycho-social context is key for general practitioners (GPs), but it remains unclear how persons with high levels of perceived stress are managed in primary care. We aimed to describe the association between perceived stress and primary care services by focussing on mental health related activities and markers of elective/acute care while accounting for mental-physical multimorbidity.

### Design

Population-based cohort study.

### Setting

Primary healthcare in Denmark.

### Participants

118,410 participants from the Danish National Health Survey 2010 followed for one year. Information on perceived stress and lifestyle was obtained from a survey questionnaire. Information on multimorbidity was obtained from health registers.

### Outcome measures

General daytime consultations, out-of-hours services, mental health related services, and chronic care services in primary care obtained from health registers.

### Results

Perceived stress levels were associated with primary care activity in a dose-response relation when adjusted for underlying conditions, lifestyle, and socioeconomic factors. In the highest stress quintile, 6.8% attended GP talk therapy (highest versus lowest quintile, adjusted incidence rate ratios (IRR): 4.96, 95% CI: 4.20–5.86), 3.3% consulted a psychologist (IRR: 6.49, 95% CI: 4.90–8.58), 21.5% redeemed an

1  
2  
3 antidepressant prescription (IRR: 4.62, 95% CI: 4.03–5.31), 23.8% attended annual chronic care  
4  
5 consultations (IRR: 1.22, 95% CI: 1.16–1.29), and 26.1% used out-of-hours services (IRR: 1.47, 95% CI:  
6  
7 1.51–1.68). For those with multimorbidity, stress was associated with more out-of-hours services, but  
8  
9 not with more chronic care services.  
10

## 11 **Conclusion**

12  
13  
14  
15  
16 Persons with high stress levels generally had higher use of primary healthcare, 4–6 times higher use of  
17  
18 mental health related services (most often in the form of psychotropic drug prescriptions), but less timely  
19  
20 use of chronic care services.  
21  
22

23  
24  
25 **Keywords (MeSH):** stress, psychological; practice patterns, physicians'; primary health care; family  
26  
27 practice; general practice; comorbidity  
28  
29  
30  
31  
32  
33  
34  
35  
36  
37  
38  
39  
40  
41  
42  
43  
44  
45  
46  
47  
48  
49  
50  
51  
52  
53  
54  
55  
56  
57  
58  
59  
60

## Article summary

### Strengths and limitations of this study

- This is the first population-based cohort study to investigate the association between stress perception and primary healthcare utilization while taking multimorbidity into account.
- A major strength of the study was the large cohort of 118,410 participants in the Danish National Health Survey 2010 who answered questions on stress, lifestyle and socioeconomic factors.
- The participants' self-reported data were linked at the individual level with national health register information on multimorbidity status, vital status, and primary care daytime and out-of-hours services, which ensured virtually no loss to follow-up.
- Multimorbidity was assessed by prospectively recorded register-based data on diagnoses and medication prescriptions for 39 mental and physical conditions.
- The limitations of this study include the lack of data on stress in non-respondents, the lack of data on private practicing psychologists, and no access to primary care medical records with details on the provided services and diagnoses.

## Introduction

Mental stress that does not fulfil the criteria for any psychiatric disorder is common in the population.<sup>1,2</sup>

This type of mental stress has gained increasing attention because of the emerging evidence on its

impact on the physical health; stress is highly associated with disease burden and physical

multimorbidity (i.e. two or more conditions in the same individual).<sup>1-5</sup> Persons with high stress levels

have a poor prognosis of physical disease, e.g. cardiovascular events and metabolic syndrome.<sup>6-8</sup>

Increased mortality rates are also seen,<sup>9</sup> even after adjusting for mental-physical multimorbidity.<sup>2,10</sup>

Allostatic load theory constitutes a theoretical framework for physiological pathways that may explain

these well-documented relations between mental and physical well-being.<sup>11,12</sup>

Mental health problems (including stress) and multimorbidity have been linked to high – and potentially

inappropriate – healthcare utilization. This includes emergency contacts, unplanned admissions, and

potentially preventable hospitalisations.<sup>13-20</sup> High perceived stress levels are inversely related to self-

efficacy, which may affect the development of chronic conditions.<sup>21</sup> Mental stress is an increasingly

common reason for contacting the general practitioner (GP),<sup>22</sup> but little is known about the services

provided by GPs and other health professionals in primary care to persons with high levels of stress. In

line with Anderson's behavioural model of healthcare utilization,<sup>23</sup> we hypothesised that high levels of

perceived stress as a predisposing factor would increase the overall number of contacts to the GP,

specifically the number of contacts related to mental health. We also hypothesised that the provided

care would differ depending on the burden of mental and physical comorbidities. Mental symptoms may

overshadow physical symptoms, and this may prevent adequate chronic care.<sup>24-26</sup> High levels of

perceived stress was thus hypothesised to be associated with poorer chronic care in those with

multimorbidity.

1  
2  
3 We aimed to describe the association between the perceived stress level in the patients and the overall  
4 frequency of day-time and out-of-hours contacts, chronic care contacts, and mental health related  
5 contacts in primary care while taking into account multimorbidity as a potential confounder and a  
6 moderator of the stress effects.  
7  
8  
9  
10  
11  
12

## 13 **Methods**

### 14 *Study population, design and setting*

15  
16  
17 The study population consisted of respondents (age > 25 years) from the nationwide Danish National  
18 Health Survey of 2010.<sup>27</sup> Survey questionnaires were collected by 1 May 2010 (index date). We excluded  
19 persons who died or emigrated before this date (2,235 persons). A total of 118,410 (response rate: 56%)  
20 returned the questionnaire with information on all perceived stress items.  
21  
22  
23  
24  
25  
26  
27

28  
29 We conducted a population-based cohort study with up to one year of follow-up until death,  
30 emigration, or end-of-study (1 May 2011), whichever came first. Using the personal identification  
31 number assigned to all Danish citizens,<sup>28</sup> we linked individual-level data across survey responses and  
32 health registers. Almost all Danish citizens are listed with a GP providing them with universal tax-funded  
33 access to healthcare.<sup>29</sup> The GP acts as a gatekeeper to secondary care and may refer to other publicly  
34 funded services in primary care.<sup>30</sup> Referrals to private practicing psychiatrists are fully covered by the  
35 healthcare system. Referrals to psychologists are partly covered if certain criteria are fulfilled, e.g. a  
36 diagnosis of depression or anxiety, or loss of a first-degree relative, but not high perceived stress in  
37 itself.  
38  
39  
40  
41  
42  
43  
44  
45  
46  
47  
48  
49

50 Danish GPs are contractors in a partly per capita, partly fee-for-service remuneration system.<sup>31</sup> The  
51 contract with the public healthcare system defines reimbursement fees for daytime consultations and  
52 out-of-hours services (typically from 4 pm to 8 am). Most medical work is covered by an unspecific base  
53  
54  
55  
56  
57  
58  
59  
60

1  
2  
3 fee, but some specific services performed during the consultation, e.g. talk therapy or psychometric  
4  
5 testing, are additionally reimbursed. Annual chronic care consultations can be performed once a year for  
6  
7 each chronic condition and are remunerated by a special fee. Invoices from the contractors are recorded  
8  
9 in the Danish National Health Service Register, which provided us with data on all contacts and publicly  
10  
11 reimbursed services performed by Danish GPs, psychologists, and psychiatrists.<sup>32</sup>  
12  
13

14  
15 Drug prescriptions are not recorded in the Danish National Health Service Register, but the Danish  
16  
17 National Prescription Registry provided data on redeemed drug prescriptions based on data from all  
18  
19 Danish pharmacies.<sup>33</sup>  
20  
21

### 22 23 24 25 26 *Perceived stress*

27  
28 In the survey questionnaire, we measured perceived stress by Cohen's Perceived Stress Scale (PSS).<sup>34-36</sup>  
29  
30 The PSS has been widely used and psychometrically validated as a reliable measure of psychological  
31  
32 stress.<sup>35,36</sup> It is based on a five-level Likert-style questionnaire with items on general stress, coping, and  
33  
34 feeling of control. The 10-item Danish version produces a sum score of 0–40; 40 points represent the  
35  
36 highest perceived stress level. The PSS has no predefined cut-off values,<sup>34</sup> but fifth quintile values are  
37  
38 often considered abnormal.<sup>1</sup> The stress score was, therefore, divided into quintiles to assess potential  
39  
40 non-linear relations with outcomes.  
41  
42  
43  
44  
45  
46  
47

### 48 49 *Multimorbidity*

50  
51 The health status of each participant on the index date was assessed using a multimorbidity index of  
52  
53 eight psychiatric and 31 physical long-term conditions (eTable 1) identified in Danish nationwide health  
54  
55 registers by a previously described algorithm.<sup>2</sup> The algorithm combined data on diagnoses from all  
56  
57  
58  
59  
60

1  
2  
3 Danish hospitals and out-patient clinics with redeemed drug prescriptions from all Danish pharmacies.  
4  
5 This approach is in line with recognised international measures of multimorbidity.<sup>37</sup> No international  
6  
7 consensus on the choice of multimorbidity indices exists, apart from some key diseases that are always  
8  
9 included.<sup>38,39</sup> Multimorbidity was defined as two or more coexisting conditions.<sup>40</sup>  
10  
11  
12  
13  
14  
15

### 16 *Outcomes*

17  
18  
19 Our main outcomes of interest were selected from the list of reimbursed services and redeemed drug  
20  
21 prescriptions. These were categorised into three groups: 1) services related to mental health (GP talk  
22  
23 therapy, GP psychometric tests, and sessions with a publicly reimbursed private practicing psychologist  
24  
25 or psychiatrist) and redemption of psychotropic medication, 2) services in general practice related to  
26  
27 elective chronic care (spirometry test for lung disease, blood sugar sampling for diabetes,  
28  
29 electrocardiograms (ECGs), home blood pressure monitoring for cardiovascular disease, and annual  
30  
31 chronic care consultations [one annual review meeting per chronic disease per patient]), and 3) the  
32  
33 overall rate of consultations based on the time of day, i.e. daytime face-to-face consultations with GPs  
34  
35 and out-of-hours services (telephone or face-to-face consultations with GP).  
36  
37  
38  
39

40 The service codes and “Anatomical Therapeutic Chemical” (ATC) medication codes used to identify the  
41  
42 outcomes can be found in the Appendix (eTable 2).  
43  
44  
45  
46  
47

### 48 *Other covariates*

49  
50  
51 Information on the highest achieved education level according to the UNESCO classification system (<10  
52  
53 years, 10-15 years, >15 years of education),<sup>41</sup> cohabitation status (single or cohabiting), and ethnicity  
54  
55 (Danish, other western background, other) was obtained from Statistics Denmark.<sup>42</sup> The Danish Civil  
56  
57  
58  
59  
60



1  
2  
3 Registration System provided information on sex, age (10-year age bands), and vital status (alive, dead,  
4 or emigrated).<sup>28</sup> Information on working status (currently employed or unemployed, students, and  
5 retirees) and lifestyle factors (physical activity [light or no weekly activity, moderate activity  $\geq 4$  hours  
6 weekly, hard activity  $\geq 4$  hours weekly], body mass index [underweight  $< 18$ , normal weight 18-25,  
7 overweight 25-30, obese  $> 30$ ], and alcohol [drinks per week for men and women], smoking [never  
8 smoker, former smoker, current smoker], and dietary habits [unhealthy, medium, healthy]) was  
9 obtained from the survey.  
10  
11  
12  
13  
14  
15  
16  
17  
18  
19  
20  
21  
22

### 23 *Statistical analysis*

24  
25  
26 Cumulative incidence proportions (CIPs), which reflect the proportion of persons with at least one  
27 contact at one year after the index date, and incidence rates (IRs), which reflect the total number of  
28 contacts during follow-up were calculated for all investigated primary care activities. We used a negative  
29 binomial regression model to calculate incidence rate ratios (IRRs) by PSS score quintiles and assigned  
30 the first PSS quintile as the reference. We then adjusted for sex, age as 10-year age bands, and presence  
31 of each of the 39 conditions in the multimorbidity index, lifestyle factors, and socioeconomic factors on  
32 the index date. We included the time at risk to account for death or immigration in both models. Cluster  
33 robust variance estimation was used to estimate 95% confidence intervals (95% CIs) to account for inter-  
34 individual heterogeneity. We imputed missing data on lifestyle and socioeconomic factors in a chained  
35 equations model of all our analysis parameters and produced 20 imputation sets.<sup>43</sup> To assess the effect  
36 modification from disease burden, we stratified the analyses on the number of the 31 physical  
37 conditions of the multimorbidity index.  
38  
39  
40  
41  
42  
43  
44  
45  
46  
47  
48  
49  
50  
51  
52

53 Three sensitivity analyses were performed to test the robustness of our results. Firstly, we included in  
54 our analysis only persons without diagnosed psychiatric illness to separate the effect of perceived stress  
55  
56  
57  
58  
59  
60

1  
2  
3 and symptoms related to psychiatric illness. Secondly, we performed a non-response analysis to test the  
4 generalisability of our findings; analyses of general primary care outcomes were carried out using  
5 register-based information on both survey respondents and non-respondents for which psychiatric  
6 illness acted as a proxy for stress (because the PSS score was unobtainable for non-respondents).  
7  
8  
9  
10  
11  
12 Thirdly, a complete-case analysis, which excluded persons with missing data, was performed to validate  
13 the use of multiple imputations on missing values.  
14  
15

16  
17 All analyses were performed using Stata 13.1 (StataCorp, College Station, TX).  
18  
19

20 The study was performed in accordance with the STROBE guidelines.  
21  
22  
23  
24  
25  
26

## 27 **Results**

28  
29  
30 The median age was 54 years (interquartile range: 23 years). The median PSS score was 11. Within the  
31 one year of follow-up, the study population was at risk for 117,856 person-years. A total of 1,042,353  
32 reimbursed primary care services and 85,962 redeemed psychotropic prescriptions of interest were  
33 recorded. The perceived stress levels were generally higher for women and tended to increase with  
34 increasing number of physical conditions and presence of psychiatric morbidity (Table 1). The  
35 distribution of survey variables across PSS quintiles has been reported elsewhere.<sup>2</sup>  
36  
37  
38  
39  
40  
41  
42  
43  
44  
45  
46  
47

### 48 *Perceived stress and primary care activities*

49  
50 For all primary care activities, except home blood pressure monitoring, a dose-response relation seemed  
51 to exist between the perceived stress level and the probability of receiving a primary care service or  
52 psychotropic prescription during follow-up (Tables 2 and 3, 1-year CIPs). The highest IRRs associated  
53  
54  
55  
56  
57  
58  
59  
60

1  
2  
3 with perceived stress were found for mental health related activities, but adjustments attenuated the  
4 association (Table 2, IRRs). Among the highest stress quintile, 6.8% attended GP talk therapy (highest  
5 versus lowest PSS quintile; adjusted IRR: 4.96, 95% CI: 4.20–5.86), 3.3% consulted a psychologist (IRR:  
6 6.49, 95% CI: 4.90–8.58), 3.7% consulted a psychiatrist (IRR: 13.26, 95% CI: 8.33–21.09), 21.5%  
7 redeemed an antidepressant prescription (IRR: 4.62, 95% CI: 4.03–5.31), 23.8% attended annual chronic  
8 care consultations (IRR: 1.22, 95% CI: 1.16–1.29), and 26.1% used out-of-hours services (IRR: 1.47, 95%  
9 CI: 1.51–1.68). The proportion of persons who visited their GP at least once during the follow-up year  
10 rose with increasing stress levels from 77% to 89% (Table 3).  
11  
12  
13  
14  
15  
16  
17  
18  
19  
20  
21  
22  
23  
24

#### 25 *Perceived stress and primary care activities by multimorbidity level*

26  
27  
28 The IRRs for receiving a mental health related service generally remained stable across PSS quintiles,  
29 regardless of underlying disease count (Figure 1, IRRs). However, in absolute terms, the use of talk  
30 therapy and psychologist services decreased and psychotropic drug prescriptions increased with  
31 increasing numbers of physical conditions (Figure 1, 1-year CIP).  
32  
33  
34  
35  
36  
37

38 Nearly all persons with physical multimorbidity visited their GP during the investigated year.

39  
40 Multimorbidity in itself was associated with use of elective chronic care services, i.e. annual chronic care  
41 consultations, blood sugar measures, ECGs, and home blood pressure monitoring (Figure 2). In those  
42 with multimorbidity, higher stress levels were not associated with more elective chronic care services  
43 than lower stress levels. In absolute numbers, the use of chronic care services tended to decrease with  
44 increasing stress level. Stress was generally associated with use of acute out-of-hours services,  
45 regardless of multimorbidity level, but those with multimorbidity tended to have higher use (Figure 2).  
46  
47  
48  
49  
50  
51  
52  
53  
54  
55  
56  
57  
58  
59  
60

### *Sensitivity analyses*

Excluding persons with psychiatric illness from the analyses did not change the overall pattern of primary care activities (eTable 3). The non-response analyses showed that survey non-respondents more often were men and mentally ill ( $p < 0.001$ ) and less often used daytime consultations and services related to chronic care (eTable 4). The adjusted IRRs of general primary care services were similar, regardless of response status when using psychiatric illness as a proxy for high levels of perceived stress (eTable 5). The complete case analysis showed virtually no differences from our main analysis with multiple imputed data (data not shown).

## **Discussion**

### *Summary of findings*

This population-based cohort study showed that the primary care activities increased with increasing perceived stress levels, even after adjusting for co-existing mental and physical conditions, lifestyle, and socioeconomic factors. However, in absolute numbers few persons with high levels of perceived stress used mental health services, and more persons received psychotropic medication prescriptions than talk therapy. The rate of preventive services, e.g. annual chronic care consultations and disease monitoring tests, did not increase with increasing stress levels in persons with multimorbidity. Most persons with high stress levels were in contact with their GP during the investigated year and had higher use of out-of-hours services than those with low stress levels.

### *Strengths and limitations*

1  
2  
3 This study was based on unique information on stress levels and lifestyle factors in a large random  
4 sample of the Danish background population. The Danish Civil Registration System<sup>28</sup> allowed us to link  
5 information across healthcare registers and ensured no loss to follow-up.  
6  
7  
8

9  
10 Non-respondents tended to be different from survey respondents. Therefore, the absolute number of  
11 contacts to primary healthcare in our study may not be generalisable to the whole population. However,  
12 we have no reason to believe that response status affected the adjusted association between perceived  
13 stress and use of primary healthcare as the service use was similar among respondents and non-  
14 respondents using a proxy for stress.  
15  
16  
17  
18  
19  
20  
21  
22

23 Both definition and measurement of stress depend on the chosen recognised stress paradigm of which  
24 several exist. Stress can be seen as a fairly objective external factor and measured as the perceived  
25 magnitude and duration of a specific stressor, such as a stressful life event or long-term work stress  
26 exposure.<sup>44</sup> Another approach is to assess stress through stress hormone levels and physiological  
27 responses to stress in the body.<sup>11</sup> In this study, we approached mental stress as a subjective self-  
28 reported state reflecting the balance between perceived stressful events and individual coping  
29 mechanisms.<sup>45</sup> This paradigm recognises that adaptation to stress is subject to numerous individual  
30 factors, including genetic predisposition and social context. The allostatic load theory synthesises the  
31 above mentioned stress paradigms in a theoretical framework focusing on the dynamic adaptation to  
32 stress over time.<sup>46</sup> Assessing perceived stress through a survey at one point in time has an important  
33 limitation; we do not know for how long the observed stress level has been present, but the PSS seems  
34 to remain fairly stable over time.<sup>47</sup>  
35  
36  
37  
38  
39  
40  
41  
42  
43  
44  
45  
46  
47  
48  
49

50 Danish health register data are prospectively recorded and validated; these data are considered to be of  
51 high quality.<sup>28,32,33</sup> All GPs report their patients' service use, and all pharmacies report redeemed  
52 prescriptions.<sup>29</sup> As reporting of primary care services is economically incentivised, high completeness is  
53  
54  
55  
56  
57  
58  
59  
60

1  
2  
3 expected.<sup>32</sup> Reporting may be incomplete if the GP forgets to register a service (e.g. talk therapy).

4  
5 However, the GP's reporting is probably unaffected by patient stress levels; a potential misclassification  
6  
7 is thus non-differential. Patients with more severe or complicated chronic disease may be followed in  
8  
9 outpatient clinics and have fewer GP chronic care visits. If stress level was a marker of disease severity,  
10  
11 this may explain the lack of association between stress and chronic care services among persons with  
12  
13 multimorbidity. Psychologist services are probably well recorded in the health registers for  
14  
15 reimbursement purposes, whereas visits paid by e.g. insurance companies and municipal or private  
16  
17 organisations are not; the use of psychologists may hence be underestimated in our study.  
18  
19

20  
21  
22 Multimorbidity status was assessed at the time of the survey by using an algorithm of prospectively  
23  
24 collected register data for up to 15 years before baseline.<sup>2</sup> The lack of a Danish register for primary care  
25  
26 diagnoses meant that multimorbidity status was based on outpatient and hospital discharge diagnoses  
27  
28 combined with recordings of repeated prescriptions. This provided us with information on chronic  
29  
30 conditions that were commonly managed in primary care, but the capture may not be complete.<sup>2</sup>  
31  
32 Psychiatric diagnoses were based on contacts to the psychiatric hospitals and out-patient clinics  
33  
34 combined with prescriptions of psychotropic drugs; there may be a general under-recognition of  
35  
36 psychiatric conditions in primary care, and the distinction between e.g. stress and depression may vary  
37  
38 among GPs.<sup>48</sup>  
39  
40

41  
42  
43 The combined data sources from the survey and registers allowed us to adjust for demographic,  
44  
45 lifestyle, and socioeconomic confounders that are known to be associated with perceived stress.<sup>2</sup>  
46

47  
48 Adjusting tended to attenuate associations, but most outcome estimates remained significantly  
49  
50 associated with the level of perceived stress. Some adjustment variables could be intermediate  
51  
52 variables. Adjusting for them would underestimate the true association, but we chose this approach as it  
53  
54 yields the most conservative estimates.<sup>49</sup>  
55  
56  
57  
58  
59  
60

1  
2  
3 For this type of epidemiological study, we lacked detailed GP records data to examine the context of the  
4 treatment and to conclude which specific factors in the patient, the doctor, and the healthcare system  
5 are most likely to cause the observed findings.  
6  
7  
8  
9

### 10 11 12 13 14 *Comparison with existing literature*

15  
16 To our knowledge, this is the first study to describe links between specific primary care services and  
17 level of stress as perceived by the patient. Existing evidence on the association between mental health  
18 and primary healthcare use is generally in line with our findings: psychosocial factors,<sup>50</sup> mental health  
19 problems,<sup>51-53</sup> and illness perception<sup>54</sup> are associated with frequent GP attendance even after accounting  
20 for the strong association between mental illness and physical health.<sup>55-57</sup> Multimorbidity is expected to  
21 increase both the number of primary care consultations and the general prescription rate,<sup>58-60</sup> which is  
22 also confirmed by our study. The effect of multimorbidity on healthcare consumption may be modified  
23 by personal factors that are known to be associated with appraised stress level, e.g. gender, age, and  
24 continuity of care.<sup>61</sup>  
25  
26  
27  
28  
29  
30  
31  
32  
33  
34  
35  
36  
37

38 The finding that stress may lead to less timely chronic care is supported by the literature on mental-  
39 physical multimorbidity; a combination of psychiatric and physical conditions seems to hinder sufficient  
40 consultation time, impose errors, and impair the general quality of chronic care in primary care.<sup>62,63</sup>  
41 High utilization of out-of-hours services and unscheduled care have been described in patients with  
42 mental health problems including stress,<sup>20</sup> specifically in patients with chronic conditions, although  
43 disease burden or severity may confound the association.<sup>19,64</sup> In our study, we had the statistical power  
44 to take into account the confounding factor of multimorbidity to counter this.  
45  
46  
47  
48  
49  
50  
51  
52  
53  
54  
55  
56  
57  
58  
59  
60

### *Implications for research and practice*

Stress appraisal was positively related to primary care activity level, regardless of mental and physical disease burden. However, the interpretation of appropriateness is difficult. A high level of perceived stress in itself does not justify a psychiatric diagnosis. As no official guidelines exist for non-syndromic stress in general practice, we cannot conclude whether the level of mental health related activities is appropriate. Interestingly, the treatment frequency was higher for antidepressants than for talk therapy provided by GPs or psychologist services. This tendency was stronger for persons with the highest stress levels and multimorbidity, especially three or more physical conditions. The underlying explanation for this association remains unknown, but persons with stress and physical multimorbidity may have a lower surplus of mental resources to interact in psychological treatment, or the complexity of health problems makes the GP decide to use the less resource-demanding pharmacological treatment. Yet, these treatment choices may be in contrast to the more general approach to mental health problems: Danish and international treatment guidelines recommend stepped care, where psychoeducation and psychosocial or psychological interventions are the first steps of choice before pharmacological treatment.<sup>65,66</sup> However, we had no means to assess the exact treatment history and the duration of the appraised level of stress in this study. Therefore, patients with multimorbidity may already have tried a number of treatment options if they have had stress for a longer period of time.

In the literature, high stress levels in patients with multimorbidity are associated with suboptimal care and adverse outcomes, e.g. more potentially preventable hospitalisations and high mortality.<sup>2,18</sup> In our study, high stress levels were not associated with higher use of preventive chronic care services for those with severe multimorbidity; more chronic care services than observed would be expected and considered appropriate in those with high stress levels. This potential undertreatment or lack of timely chronic disease management in persons with mental-physical multimorbidity may play a role in the



1  
2  
3 explanation of adverse outcomes. Conversely, highly stressed persons requested acute out-of-hours  
4 services more often than the less stressed, which is generally seen as a less desirable contact pattern for  
5 chronic disease management.<sup>67</sup>  
6  
7

8  
9  
10 The appropriate number of GP contacts and prescriptions for certain disease combinations cannot be  
11 deducted from our data because no information was available on the individual's full medical  
12 complexity, self-efficacy, and social network. However, persons with high stress levels seemed to have a  
13 less timely appropriate use of primary care services. This, in addition to a poorer prognosis, calls for  
14 more focus on the mental well-being of patients even when no psychiatric illness is diagnosed. This also  
15 underlines the importance of the psychological aspect in the bio-psycho-social approach to treatment of  
16 persons with multimorbidity.  
17  
18  
19  
20  
21  
22  
23  
24  
25

26  
27 The PSS measures an independent stress construct and was originally intended as a one-dimensional  
28 scale without predefined cut-off values.<sup>34</sup> The value of the score may not be easily interpretable in a  
29 clinical setting, and caseness is difficult to operationalise. Stress symptoms are common in psychiatric  
30 disorders and overlaps exist, which is also reflected in the correlation between measurements of stress,  
31 depression, and anxiety.<sup>36,68,69</sup> However, directing the focus away from diagnoses has important  
32 strengths, e.g. less stigmatization and reduced focus on pharmacological treatment. No validated clinical  
33 instrument is available for stress screening in general practice, and it is uncertain if screening is a good  
34 solution. Additionally, the GP may not be able to offer patients with stress much treatment as no well-  
35 developed management guidelines exist. More importantly, the time frame and setting in which the GP  
36 meets the patient should support the assessment of the patient's mental well-being and resources. This  
37 can be challenging for the GPs in patients with multimorbidity, where the treatment is multifaceted, and  
38 care is strongly affected by psychosocial factors.<sup>70</sup> Models of collaborative and integrated care aim to  
39 redefine the GP consultation and focus more on empowering patients with co-existing mental and  
40  
41  
42  
43  
44  
45  
46  
47  
48  
49  
50  
51  
52  
53  
54  
55  
56  
57  
58  
59  
60

1  
2  
3 physical health problems.<sup>71,72</sup> Patient-centred care is essential in achieving this goal.<sup>73,74</sup> Stress-  
4  
5 alleviating interventions may improve the prognosis if the association between perceived stress and  
6  
7 adverse outcomes is causal. Mindfulness-based stress reduction and problem-solving therapy could play  
8  
9 a role.<sup>75,76</sup>  
10

11  
12  
13 Mental stress and multimorbidity are common problems that often coexist in the general population.  
14  
15 Therefore, even a small impact of stress on the prognosis and general healthcare utilization may be  
16  
17 relevant in public health. Future research should explore potential management strategies and  
18  
19 preventive interventions aimed at patients with mental stress. Patient-centred care research and  
20  
21 qualitative research conducted in primary care may provide some new answers to these questions.  
22  
23  
24  
25  
26  
27  
28  
29  
30  
31  
32  
33  
34  
35  
36  
37  
38  
39  
40  
41  
42  
43  
44  
45  
46  
47  
48  
49  
50  
51  
52  
53  
54  
55  
56  
57  
58  
59  
60

## Additional information

**Funding:** This work was supported by an unrestricted grant (grant number: R155-2012-11280) from the Lundbeck Foundation (MEPRICA), by the Program for Clinical Research Infrastructure (PROCRIN) established by the Lundbeck Foundation and the Novo Nordisk Foundation and administered by Danish Regions, and by the Central Denmark Region Foundation for Primary Health Care Research. The Danish Health Profile 2010 was funded by the Capital Region of Denmark, Region Zealand, the Region of Southern Denmark, the Central Denmark Region, the North Denmark Region, the Danish Ministry of Interior and Health, and the National Institute of Public Health at the University of Southern Denmark. The funding sources had no role in the design and conduct of the study; collection, management, analysis, and interpretation of the data; and preparation, review, or approval of the manuscript.

**Ethical approval:** The study was approved by the Danish Data Protection Agency (record number 2013-41-1719). All data were anonymized and securely stored at Statistics Denmark.

**Competing interests:** None declared.

**Acknowledgements:** Data support was given by the National Centre for Register-Based Research, Aarhus BSS, Aarhus University, Denmark.

**Author statement:** AP, MFG, KKL, and MV conceived the study. Data collection and analyses were mainly done by AP and MFG. AP wrote the first draft. All authors contributed to the interpretation of data, the preparation of the manuscript and approved the final version.

**Data sharing statement:** No additional data available.

## References

1. Nielsen L, Curtis T, Kristensen TS, Rod Nielsen N. What characterizes persons with high levels of perceived stress in Denmark? A national representative study. *Scand J Public Health*. 2008;36(4):369-379.
2. Prior A, Fenger-Grøn M, Larsen KK, et al. The association between perceived stress and mortality among people with multimorbidity: A prospective population-based cohort study. *Am J Epidemiol*. 2016;184(3):199-210.
3. Keller A, Litzelman K, Wisk LE, et al. Does the perception that stress affects health matter? the association with health and mortality. *Health Psychol*. 2012;31(5):677-684.
4. Fortin M, Bravo G, Hudon C, Lapointe L, Dubois MF, Almirall J. Psychological distress and multimorbidity in primary care. *Ann Fam Med*. 2006;4(5):417-422.
5. Van Den Akker M, Buntinx F, Knottnerus JA. Comorbidity or multimorbidity: What's in a name? A review of literature. *Eur J Gen Pract*. 1996;2(2):65-70.
6. Stansfeld SA, Fuhrer R, Shipley MJ, Marmot MG. Psychological distress as a risk factor for coronary heart disease in the whitehall II study. *Int J Epidemiol*. 2002;31(1):248-255.
7. Kivimaki M, Virtanen M, Elovainio M, Kouvonen A, Vaananen A, Vahtera J. Work stress in the etiology of coronary heart disease--a meta-analysis. *Scand J Work Environ Health*. 2006;32(6):431-442.
8. Chandola T, Brunner E, Marmot M. Chronic stress at work and the metabolic syndrome: Prospective study. *BMJ*. 2006;332(7540):521-525.

- 1  
2  
3 9. Russ TC, Stamatakis E, Hamer M, Starr JM, Kivimaki M, Batty GD. Association between psychological  
4  
5 distress and mortality: Individual participant pooled analysis of 10 prospective cohort studies. *BMJ*.  
6  
7 2012;345:e4933.  
8  
9
- 10  
11 10. Prior A, Fenger-Gron M, Davydow DS, et al. Bereavement, multimorbidity and mortality: A  
12  
13 population-based study using bereavement as an indicator of mental stress. *Psychol Med*. 2017:1-9.  
14  
15
- 16  
17 11. Stratakis CA, Chrousos GP. Neuroendocrinology and pathophysiology of the stress system. *Ann N Y*  
18  
19 *Acad Sci*. 1995;771:1-18.  
20  
21
- 22  
23 12. McEwen BS. Protective and damaging effects of stress mediators. *N Engl J Med*. 1998;338(3):171-  
24  
25 179.  
26  
27
- 28  
29 13. Mitchell SE, Paasche-Orlow MK, Forsythe SR, et al. Post-discharge hospital utilization among adult  
30  
31 medical inpatients with depressive symptoms. *J Hosp Med*. 2010;5(7):378-384.  
32  
33
- 34  
35 14. Davydow DS, Fenger-Gron M, Ribe AR, et al. Depression and risk of hospitalisations and  
36  
37 rehospitalisations for ambulatory care-sensitive conditions in denmark: A population-based cohort  
38  
39 study. *BMJ Open*. 2015;5(12):e009878-2015-009878.  
40  
41
- 42  
43 15. Wolff JL, Starfield B, Anderson G. Prevalence, expenditures, and complications of multiple chronic  
44  
45 conditions in the elderly. *Arch Intern Med*. 2002;162(20):2269-2276.  
46  
47
- 48  
49 16. Himelhoch S, Weller WE, Wu AW, Anderson GF, Cooper LA. Chronic medical illness, depression, and  
50  
51 use of acute medical services among medicare beneficiaries. *Med Care*. 2004;42(6):512-521.  
52  
53  
54  
55  
56  
57  
58  
59  
60

- 1  
2  
3 17. Payne RA, Abel GA, Guthrie B, Mercer SW. The effect of physical multimorbidity, mental health  
4 conditions and socioeconomic deprivation on unplanned admissions to hospital: A retrospective cohort  
5 study. *CMAJ*. 2013;185(5):E221-8.  
6  
7  
8  
9  
10  
11 18. Prior A, Vestergaard M, Davydow DS, Larsen KK, Ribe AR, Fenger-Grøn M. Perceived stress,  
12 multimorbidity, and risk for hospitalizations for ambulatory care-sensitive conditions: A population-  
13 based cohort study. *Med Care*. 2017;55(2):131-139.  
14  
15  
16  
17  
18  
19 19. Dickens C, Katon W, Blakemore A, et al. Does depression predict the use of urgent and unscheduled  
20 care by people with long term conditions? A systematic review with meta-analysis. *J Psychosom Res*.  
21 2012;73(5):334-342.  
22  
23  
24  
25  
26  
27 20. Payne F. Utilization of out-of-hours services by patients with mental health problems. *J Public Health*  
28 *Med*. 2000;22(3):302-306.  
29  
30  
31  
32 21. Stewart DE, Yuen T. A systematic review of resilience in the physically ill. *Psychosomatics*.  
33 2011;52(3):199-209.  
34  
35  
36  
37  
38 22. Moth G, Olesen F, Vedsted P. Reasons for encounter and disease patterns in danish primary care:  
39 Changes over 16 years. *Scand J Prim Health Care*. 2012;30(2):70-75.  
40  
41  
42  
43  
44 23. Andersen RM. Revisiting the behavioral model and access to medical care: Does it matter? *J Health*  
45 *Soc Behav*. 1995;36(1):1-10.  
46  
47  
48  
49 24. Katon W, Sullivan M, Walker E. Medical symptoms without identified pathology: Relationship to  
50 psychiatric disorders, childhood and adult trauma, and personality traits. *Ann Intern Med*. 2001;134(9 Pt  
51 2):917-925.  
52  
53  
54  
55  
56  
57  
58  
59  
60

- 1  
2  
3 25. Redelmeier DA, Tan SH, Booth GL. The treatment of unrelated disorders in patients with chronic  
4  
5 medical diseases. *N Engl J Med*. 1998;338(21):1516-1520.  
6  
7  
8  
9 26. Rosendal M, Vedsted P, Christensen KS, Moth G. Psychological and social problems in primary care  
10  
11 patients - general practitioners' assessment and classification. *Scand J Prim Health Care*. 2013;31(1):43-  
12  
13 49.  
14  
15  
16 27. Christensen AI, Ekholm O, Glumer C, et al. The Danish National Health Survey 2010. Study design and  
17  
18 respondent characteristics. *Scand J Public Health*. 2012;40(4):391-397.  
19  
20  
21  
22 28. Pedersen CB, Gotzsche H, Moller JO, Mortensen PB. The Danish civil registration system. A cohort of  
23  
24 eight million persons. *Dan Med Bull*. 2006;53(4):441-449.  
25  
26  
27  
28 29. Christiansen T. Organization and financing of the Danish health care system. *Health Policy*.  
29  
30 2002;59(2):107-118.  
31  
32  
33 30. Velasco Garrido M, Zentner A, Busse R. The effects of gatekeeping: A systematic review of the  
34  
35 literature. *Scand J Prim Health Care*. 2011;29(1):28-38.  
36  
37  
38  
39 31. Pedersen KM, Andersen JS, Sondergaard J. General practice and primary health care in denmark. *J*  
40  
41 *Am Board Fam Med*. 2012;25 Suppl 1:S34-8.  
42  
43  
44  
45 32. Andersen JS, Olivarius Nde F, Krasnik A. The danish national health service register. *Scand J Public*  
46  
47 *Health*. 2011;39(7 Suppl):34-37.  
48  
49  
50  
51 33. Kildemoes HW, Sorensen HT, Hallas J. The danish national prescription registry. *Scand J Public*  
52  
53 *Health*. 2011;39(7 Suppl):38-41.  
54  
55  
56  
57  
58  
59  
60

- 1  
2  
3 34. Cohen S, Kamarck T, Mermelstein R. A global measure of perceived stress. *J Health Soc Behav.*  
4  
5 1983;24(4):385-396.  
6  
7  
8  
9 35. Cohen S, Williamson G. Perceived stress in a probability sample in the United States  
10  
11 In: Spacapan S, Oskamp S, eds. *The social psychology of health*  
12  
13 . Newbury Park, CA: SAGE; 1988:31-67.  
14  
15  
16  
17 36. Lee E. Review of the psychometric evidence of the perceived stress scale. *Asian Nursing Research.*  
18  
19 2012;6(4):121-127.  
20  
21  
22 37. Barnett K, Mercer SW, Norbury M, Watt G, Wyke S, Guthrie B. Epidemiology of multimorbidity and  
23  
24 implications for health care, research, and medical education: A cross-sectional study. *Lancet.*  
25  
26 2012;380(9836):37-43.  
27  
28  
29  
30 38. Huntley AL, Johnson R, Purdy S, Valderas JM, Salisbury C. Measures of multimorbidity and morbidity  
31  
32 burden for use in primary care and community settings: A systematic review and guide. *Ann Fam Med.*  
33  
34 2012;10(2):134-141.  
35  
36  
37  
38 39. Diederichs C, Berger K, Bartels DB. The measurement of multiple chronic diseases--a systematic  
39  
40 review on existing multimorbidity indices. *J Gerontol A Biol Sci Med Sci.* 2011;66(3):301-311.  
41  
42  
43  
44 40. Valderas JM, Starfield B, Sibbald B, Salisbury C, Roland M. Defining comorbidity: Implications for  
45  
46 understanding health and health services. *Ann Fam Med.* 2009;7(4):357-363.  
47  
48  
49 41. United Nations Educational, Scientific and Cultural Organization. International standard classification  
50  
51 of education (ISCED). <http://www.uis.unesco.org/Education/Documents/isced-2011-en.pdf>. Accessed 10  
52  
53 December 2015.  
54  
55  
56  
57  
58  
59  
60



1  
2  
3 42. Statistics Denmark. Statistics Denmark. Statistics Denmark Web site.

4  
5 [http://www.dst.dk/ext/645846915/0/forskning/Access-to-micro-data-at-Statistics-Denmark\\_2014--pdf](http://www.dst.dk/ext/645846915/0/forskning/Access-to-micro-data-at-Statistics-Denmark_2014--pdf).

6  
7 Updated 2014. Accessed 20 May, 2015.

8  
9  
10  
11 43. White IR, Royston P, Wood AM. Multiple imputation using chained equations: Issues and guidance  
12 for practice. *Stat Med*. 2011;30(4):377-399.

13  
14  
15  
16 44. Holmes TH, Rahe RH. The social readjustment rating scale. *J Psychosom Res*. 1967;11(2):213-218.

17  
18  
19  
20 45. Folkman S, Lazarus RS. The relationship between coping and emotion: Implications for theory and  
21 research. *Soc Sci Med*. 1988;26(3):309-317.

22  
23  
24  
25 46. McEwen BS, Stellar E. Stress and the individual. mechanisms leading to disease. *Arch Intern Med*.  
26 1993;153(18):2093-2101.

27  
28  
29  
30  
31 47. Barbosa-Leiker C, Kostick M, Lei M, et al. Measurement invariance of the perceived stress scale and  
32 latent mean differences across gender and time. *Stress Health*. 2013;29(3):253-260.

33  
34  
35  
36 48. Klinkman MS, Coyne JC, Gallo S, Schwenk TL. False positives, false negatives, and the validity of the  
37 diagnosis of major depression in primary care. *Arch Fam Med*. 1998;7(5):451-461.

38  
39  
40  
41  
42 49. Rothman KJ, Greenland S, Lash TL. *Modern epidemiology*. 3rd ed. Philadelphia, PA: Lippincott  
43 Williams & Wilkins; 2008.

44  
45  
46  
47  
48 50. Bellon JA, Delgado-Sanchez A, de Dios Luna J, Lardelli-Claret P. Patient psychosocial factors and  
49 primary care consultation: A cohort study. *Fam Pract*. 2007;24(6):562-569.

- 1  
2  
3 51. Dowrick CF, Bellon JA, Gomez MJ. GP frequent attendance in Liverpool and Granada: The impact of  
4 depressive symptoms. *Br J Gen Pract.* 2000;50(454):361-365.  
5  
6  
7  
8  
9 52. Vedsted P, Fink P, Olesen F, Munk-Jorgensen P. Psychological distress as a predictor of frequent  
10 attendance in family practice: A cohort study. *Psychosomatics.* 2001;42(5):416-422.  
11  
12  
13  
14 53. Bellon JA, Delgado A, Luna JD, Lardelli P. Psychosocial and health belief variables associated with  
15 frequent attendance in primary care. *Psychol Med.* 1999;29(6):1347-1357.  
16  
17  
18  
19  
20 54. Frostholm L, Fink P, Christensen KS, et al. The patients' illness perceptions and the use of primary  
21 health care. *Psychosom Med.* 2005;67(6):997-1005.  
22  
23  
24  
25  
26 55. Gawronski KA, Kim ES, Miller LE. Potentially traumatic events and serious life stressors are  
27 prospectively associated with frequency of doctor visits and overnight hospital visits. *J Psychosom Res.*  
28 2014;77(2):90-96.  
29  
30  
31  
32  
33  
34 56. Smits FT, Brouwer HJ, Zwinderman AH, et al. Why do they keep coming back? Psychosocial etiology  
35 of persistence of frequent attendance in primary care: a prospective cohort study. *J Psychosom Res.*  
36 2014;77(6):492-503.  
37  
38  
39  
40  
41 57. Gili M, Sese A, Bauza N, et al. Mental disorders, chronic conditions and psychological factors: a path  
42 analysis model for healthcare consumption in general practice. *Int Rev Psychiatry.* 2011;23(1):20-27.  
43  
44  
45  
46  
47 58. van Oostrom SH, Picavet HS, de Bruin SR, et al. Multimorbidity of chronic diseases and health care  
48 utilization in general practice. *BMC Fam Pract.* 2014;15:61-2296-15-61.  
49  
50  
51  
52  
53  
54  
55  
56  
57  
58  
59  
60

- 1  
2  
3 59. van den Bussche H, Schon G, Kolonko T, et al. Patterns of ambulatory medical care utilization in  
4 elderly patients with special reference to chronic diseases and multimorbidity - results from a claims  
5 data based observational study in Germany. *BMC Geriatr*. 2011;11:54-2318-11-54.  
6  
7  
8  
9  
10  
11 60. Westert GP, Satariano WA, Schellevis FG, van den Bos GA. Patterns of comorbidity and the use of  
12 health services in the Dutch population. *Eur J Public Health*. 2001;11(4):365-372.  
13  
14  
15  
16  
17 61. Gruneir A, Bronskill SE, Maxwell CJ, et al. The association between multimorbidity and  
18 hospitalization is modified by individual demographics and physician continuity of care: A retrospective  
19 cohort study. *BMC Health Serv Res*. 2016;16:154-016-1415-5.  
20  
21  
22  
23  
24 62. Panagioti M, Stokes J, Esmail A, et al. Multimorbidity and patient safety incidents in primary care: A  
25 systematic review and meta-analysis. *PLoS One*. 2015;10(8):e0135947.  
26  
27  
28  
29  
30 63. Moth G, Vestergaard M, Vedsted P. Chronic care management in Danish general practice--a cross-  
31 sectional study of workload and multimorbidity. *BMC Fam Pract*. 2012;13:52-2296-13-52.  
32  
33  
34  
35  
36 64. Langer S, Chew-Graham C, Hunter C, Guthrie EA, Salmon P. Why do patients with long-term  
37 conditions use unscheduled care? A qualitative literature review. *Health Soc Care Community*.  
38 2013;21(4):339-351.  
39  
40  
41  
42  
43  
44 65. National Institute for Health and Care Excellence. Depression in adults: Recognition and  
45 management. <https://www.nice.org.uk/guidance/cg90/>. Published April 2016. Updated 2016. Accessed  
46 15 November 2016.  
47  
48  
49  
50  
51 66. Danish Health Authority. NATIONAL CLINICAL GUIDELINE FOR THE NONPHARMACOLOGICAL  
52 TREATMENT OF UNIPOLAR DEPRESSION quick guide.  
53  
54  
55  
56  
57  
58  
59  
60

1  
2  
3 [http://sundhedsstyrelsen.dk/da/udgivelser/2016/~/\\_/media/A535E69EE4994F7BA1170A70156C401D.ash](http://sundhedsstyrelsen.dk/da/udgivelser/2016/~/_/media/A535E69EE4994F7BA1170A70156C401D.ash)

4  
5 [x](#). Published July 2016. Updated 2016. Accessed 15 November, 2016.

6  
7  
8  
9 67. Keizer E, Maassen I, Smits M, Wensing M, Giesen P. Reducing the use of out-of-hours primary care  
10 services: A survey among Dutch general practitioners. *Eur J Gen Pract*. 2016;22(3):189-195.

11  
12  
13  
14 68. Remor E. Psychometric properties of a european spanish version of the perceived stress scale (PSS).  
15  
16 *Span J Psychol*. 2006;9(1):86-93.

17  
18  
19  
20 69. Wang Z, Chen J, Boyd JE, et al. Psychometric properties of the chinese version of the perceived stress  
21 scale in policewomen. *PLoS One*. 2011;6(12):e28610.

22  
23  
24  
25 70. O'Brien R, Wyke S, Guthrie B, Watt G, Mercer S. An 'endless struggle': A qualitative study of general  
26 practitioners' and practice nurses' experiences of managing multimorbidity in socio-economically  
27 deprived areas of scotland. *Chronic Illn*. 2011;7(1):45-59.

28  
29  
30  
31 71. Mead N, Bower P. Patient-centredness: A conceptual framework and review of the empirical  
32 literature. *Soc Sci Med*. 2000;51(7):1087-1110.

33  
34  
35  
36 72. Ivbijaro GO, Enum Y, Khan AA, Lam SS, Gabzdyl A. Collaborative care: Models for treatment of  
37 patients with complex medical-psychiatric conditions. *Curr Psychiatry Rep*. 2014;16(11):506-014-0506-4.

38  
39  
40  
41 73. Jani B, Bikker AP, Higgins M, et al. Patient centredness and the outcome of primary care  
42 consultations with patients with depression in areas of high and low socioeconomic deprivation. *Br J*  
43 *Gen Pract*. 2012;62(601):e576-81.

44  
45  
46  
47 74. Mercer SW, Fitzpatrick B, Guthrie B, et al. The CARE plus study - a whole-system intervention to  
48 improve quality of life of primary care patients with multimorbidity in areas of high socioeconomic  
49

1  
2  
3 deprivation: Exploratory cluster randomised controlled trial and cost-utility analysis. *BMC Med.*  
4  
5 2016;14(1):88-016-0634-2.  
6

7  
8  
9 75. Bohlmeijer E, Prenger R, Taal E, Cuijpers P. The effects of mindfulness-based stress reduction therapy  
10 on mental health of adults with a chronic medical disease: A meta-analysis. *J Psychosom Res.*  
11  
12 2010;68(6):539-544.  
13  
14

15  
16 76. Sharpe L, Gittins CB, Correia HM, et al. Problem-solving versus cognitive restructuring of medically ill  
17 seniors with depression (PROMISE-D trial): Study protocol and design. *BMC Psychiatry.* 2012;12:207-  
18  
19 244X-12-207.  
20  
21  
22  
23  
24  
25  
26  
27  
28  
29  
30  
31  
32  
33  
34  
35  
36  
37  
38  
39  
40  
41  
42  
43  
44  
45  
46  
47  
48  
49  
50  
51  
52  
53  
54  
55  
56  
57  
58  
59  
60

## Tables and figures legends

For peer review only

**Table 1. Study population characteristics according to Perceived Stress Scale quintile.**

| Characteristics           | Total<br>Number | Total<br>Col % | PSS quintile |             |             |             |             |
|---------------------------|-----------------|----------------|--------------|-------------|-------------|-------------|-------------|
|                           |                 |                | 1<br>Row %   | 2<br>Row %  | 3<br>Row %  | 4<br>Row %  | 5<br>Row %  |
| Median PSS score (range)  |                 |                | 4 (0–6)      | 9 (7–10)    | 12 (11–13)  | 15 (14–17)  | 21 (18–40)  |
| Age groups, years         |                 |                |              |             |             |             |             |
| 25-34                     | 13,881          | 11.7           | 23.2         | 24.9        | 23.6        | 14.1        | 14.2        |
| 35-44                     | 22,673          | 19.1           | 26.7         | 25.4        | 22.0        | 13.2        | 12.7        |
| 45-54                     | 25,272          | 21.3           | 28.5         | 25.0        | 21.1        | 12.8        | 12.6        |
| 55-64                     | 26,610          | 22.5           | 31.1         | 24.6        | 20.6        | 12.8        | 11.0        |
| 65-74                     | 19,982          | 16.9           | 31.1         | 23.5        | 20.6        | 14.7        | 10.0        |
| ≥75                       | 9,992           | 8.4            | 20.8         | 19.6        | 21.8        | 20.1        | 17.7        |
| Sex                       |                 |                |              |             |             |             |             |
| Men                       | 54,968          | 46.4           | 26.1         | 24.8        | 17.7        | 16.5        | 14.8        |
| Women                     | 63,442          | 53.6           | 19.4         | 22.3        | 18.1        | 19.0        | 21.2        |
| Number of conditions      |                 |                |              |             |             |             |             |
| 0                         | 58,718          | 49.6           | 25.6         | 26.3        | 18.9        | 16.5        | 12.7        |
| 1                         | 2,5755          | 21.8           | 22.2         | 22.9        | 17.8        | 18.1        | 18.9        |
| 2                         | 14,677          | 12.4           | 21.1         | 21.5        | 17.3        | 18.6        | 21.6        |
| ≥3                        | 19,260          | 16.3           | 14.6         | 17.2        | 15.6        | 20.8        | 31.7        |
| Any psychiatric condition |                 |                |              |             |             |             |             |
| No                        | 109,137         | 92.2           | 23.8         | 24.6        | 18.4        | 17.7        | 15.5        |
| Yes                       | 9,273           | 7.8            | 7.3          | 10.9        | 12.3        | 19.5        | 50.0        |
| <b>Total</b>              | <b>118,410</b>  | <b>100.0</b>   | <b>22.5</b>  | <b>23.5</b> | <b>18.0</b> | <b>17.8</b> | <b>18.2</b> |

PSS: Perceived Stress Scale

**Table 2. Cumulative incidence proportions and incidence rate ratios of mental health related primary care activities according to Perceived Stress Scale quintile.**

| Primary care service          | PSS      |                       |             | IR   | Crude IRR | Adj.  |              |
|-------------------------------|----------|-----------------------|-------------|------|-----------|-------|--------------|
|                               | quintile | CIP <sub>1y</sub> (%) | 95% CI      |      |           | IRR*  | 95% CI       |
| Talk therapy by GP            | 1        | 1.1                   | (1.0,1.2)   | 0.02 | 1         | 1     | Reference    |
|                               | 2        | 1.7                   | (1.5,1.8)   | 0.03 | 1.48      | 1.38  | (1.15,1.65)  |
|                               | 3        | 2.2                   | (2.0,2.4)   | 0.04 | 2.01      | 1.72  | (1.43,2.06)  |
|                               | 4        | 3.1                   | (2.9,3.3)   | 0.06 | 2.76      | 2.38  | (1.99,2.83)  |
|                               | 5        | 6.8                   | (6.5,7.2)   | 0.15 | 6.90      | 4.96  | (4.20,5.86)  |
| Psychometric tests            | 1        | 1.2                   | (1.1,1.3)   | 0.02 | 1         | 1     | Reference    |
|                               | 2        | 1.8                   | (1.6,1.9)   | 0.02 | 1.38      | 1.26  | (1.06,1.51)  |
|                               | 3        | 2.5                   | (2.3,2.7)   | 0.04 | 2.04      | 1.75  | (1.46,2.10)  |
|                               | 4        | 3.2                   | (2.9,3.4)   | 0.05 | 2.82      | 2.16  | (1.82,2.56)  |
|                               | 5        | 6.6                   | (6.2,6.9)   | 0.10 | 5.96      | 3.68  | (3.11,4.35)  |
| Psychologist services         | 1        | 0.4                   | (0.4,0.5)   | 0.02 | 1         | 1     | Reference    |
|                               | 2        | 0.7                   | (0.6,0.8)   | 0.04 | 1.57      | 1.49  | (1.08,2.05)  |
|                               | 3        | 1.2                   | (1.0,1.3)   | 0.06 | 2.54      | 1.99  | (1.47,2.69)  |
|                               | 4        | 1.5                   | (1.4,1.7)   | 0.08 | 3.53      | 3.07  | (2.26,4.16)  |
|                               | 5        | 3.3                   | (3.1,3.6)   | 0.21 | 8.69      | 6.49  | (4.90,8.58)  |
| Psychiatrist services         | 1        | 0.2                   | (0.1,0.3)   | 0.01 | 1         | 1     | Reference    |
|                               | 2        | 0.3                   | (0.3,0.4)   | 0.02 | 2.17      | 1.96  | (1.16,3.32)  |
|                               | 3        | 0.5                   | (0.4,0.6)   | 0.03 | 3.20      | 1.92  | (1.07,3.46)  |
|                               | 4        | 0.9                   | (0.8,1.0)   | 0.06 | 6.86      | 4.61  | (2.77,7.69)  |
|                               | 5        | 3.7                   | (3.4,4.0)   | 0.24 | 28.74     | 13.26 | (8.33,21.09) |
| Antidepressants prescriptions | 1        | 2.6                   | (2.4,2.8)   | 0.10 | 1         | 1     | Reference    |
|                               | 2        | 3.7                   | (3.5,3.9)   | 0.16 | 1.55      | 1.28  | (1.09,1.49)  |
|                               | 3        | 5.7                   | (5.4,6.0)   | 0.25 | 2.37      | 1.84  | (1.58,2.16)  |
|                               | 4        | 8.6                   | (8.2,9.0)   | 0.40 | 3.85      | 2.35  | (2.04,2.71)  |
|                               | 5        | 21.5                  | (20.9,22.0) | 1.21 | 11.63     | 4.62  | (4.03,5.31)  |
| Anxiolytics prescriptions     | 1        | 1.5                   | (1.4,1.7)   | 0.03 | 1         | 1     | Reference    |
|                               | 2        | 2.0                   | (1.8,2.2)   | 0.05 | 1.61      | 1.53  | (1.29,1.83)  |
|                               | 3        | 2.8                   | (2.6,3.0)   | 0.08 | 2.59      | 2.02  | (1.67,2.44)  |
|                               | 4        | 4.1                   | (3.8,4.4)   | 0.13 | 4.27      | 2.56  | (2.16,3.03)  |
|                               | 5        | 9.4                   | (9.0,9.8)   | 0.46 | 14.52     | 4.73  | (4.03,5.54)  |
| Hypnotics prescriptions       | 1        | 3.4                   | (3.2,3.6)   | 0.08 | 1         | 1     | Reference    |
|                               | 2        | 4.3                   | (4.0,4.5)   | 0.11 | 1.39      | 1.34  | (1.18,1.51)  |
|                               | 3        | 5.3                   | (5.0,5.6)   | 0.16 | 2.03      | 1.67  | (1.47,1.89)  |
|                               | 4        | 6.6                   | (6.3,7.0)   | 0.22 | 2.77      | 1.83  | (1.61,2.07)  |
|                               | 5        | 11.0                  | (10.6,11.5) | 0.5  | 6.32      | 2.93  | (2.59,3.31)  |

PSS: Perceived Stress Scale. CI: Confidence interval. CIP<sub>1y</sub>: Cumulative incidence proportion at one year (in %). IR: Incidence rate. IRR: Incidence rate ratio.

\*: adjusted for sex, age as 10-year age bands, presence of each of the 39 psychiatric and physical conditions in the multimorbidity index, socioeconomic factors, and lifestyle on index date.



**Table 3. Cumulative incidence proportions and incidence rate ratios of general primary care and chronic care services according to Perceived Stress Scale quintile.**

| Primary care service              | PSS      |                       | 95% CI      | IR   | Crude IRR | Adj. |             |
|-----------------------------------|----------|-----------------------|-------------|------|-----------|------|-------------|
|                                   | quintile | CIP <sub>1y</sub> (%) |             |      |           | IRR* | 95% CI      |
| Spirometries                      | 1        | 2.6                   | (2.4,2.8)   | 0.03 | 1         | 1    | Reference   |
|                                   | 2        | 3.0                   | (2.8,3.2)   | 0.04 | 1.15      | 1.12 | (1.00,1.25) |
|                                   | 3        | 3.0                   | (2.8,3.3)   | 0.04 | 1.14      | 1.06 | (0.94,1.19) |
|                                   | 4        | 3.6                   | (3.4,3.9)   | 0.05 | 1.40      | 1.17 | (1.04,1.32) |
|                                   | 5        | 4.4                   | (4.1,4.6)   | 0.06 | 1.67      | 1.16 | (1.03,1.31) |
| Blood sugar measures              | 1        | 13.9                  | (13.5,14.3) | 0.21 | 1         | 1    | Reference   |
|                                   | 2        | 13.7                  | (13.3,14.1) | 0.21 | 1.02      | 1.02 | (0.97,1.07) |
|                                   | 3        | 14.7                  | (14.2,15.2) | 0.23 | 1.08      | 1.05 | (0.99,1.10) |
|                                   | 4        | 16.3                  | (15.8,16.8) | 0.27 | 1.26      | 1.09 | (1.04,1.15) |
|                                   | 5        | 18.4                  | (17.8,18.9) | 0.3  | 1.44      | 1.12 | (1.06,1.18) |
| ECGs                              | 1        | 7.4                   | (7.1,7.7)   | 0.08 | 1         | 1    | Reference   |
|                                   | 2        | 7.7                   | (7.4,8.0)   | 0.09 | 1.03      | 1.05 | (0.99,1.12) |
|                                   | 3        | 8.0                   | (7.6,8.4)   | 0.09 | 1.10      | 1.08 | (1.02,1.16) |
|                                   | 4        | 9.2                   | (8.9,9.6)   | 0.11 | 1.29      | 1.17 | (1.09,1.25) |
|                                   | 5        | 9.6                   | (9.3,10.1)  | 0.11 | 1.32      | 1.14 | (1.07,1.22) |
| Home blood pressure measures      | 1        | 5.2                   | (4.9,5.5)   | 0.07 | 1         | 1    | Reference   |
|                                   | 2        | 5.2                   | (5.0,5.5)   | 0.07 | 0.99      | 1.05 | (0.96,1.14) |
|                                   | 3        | 5.3                   | (5.0,5.6)   | 0.07 | 1.01      | 1.04 | (0.95,1.14) |
|                                   | 4        | 5.6                   | (5.3,6.0)   | 0.08 | 1.11      | 1.10 | (1.00,1.20) |
|                                   | 5        | 5.2                   | (4.9,5.5)   | 0.07 | 0.97      | 1.02 | (0.93,1.13) |
| Annual chronic care consultations | 1        | 18.1                  | (17.6,18.5) | 0.31 | 1         | 1    | Reference   |
|                                   | 2        | 17.9                  | (17.5,18.4) | 0.31 | 1.01      | 1.02 | (0.97,1.06) |
|                                   | 3        | 18.7                  | (18.2,19.2) | 0.33 | 1.09      | 1.04 | (0.99,1.10) |
|                                   | 4        | 21.0                  | (20.4,21.5) | 0.39 | 1.27      | 1.09 | (1.04,1.14) |
|                                   | 5        | 23.8                  | (23.2,24.4) | 0.47 | 1.53      | 1.22 | (1.16,1.29) |
| Out-of-hours contacts             | 1        | 14.2                  | (13.8,14.7) | 0.21 | 1         | 1    | Reference   |
|                                   | 2        | 16.1                  | (15.7,16.5) | 0.25 | 1.16      | 1.07 | (1.02,1.13) |
|                                   | 3        | 17.4                  | (16.9,18.0) | 0.28 | 1.32      | 1.13 | (1.07,1.19) |
|                                   | 4        | 19.7                  | (19.1,20.2) | 0.33 | 1.57      | 1.22 | (1.16,1.29) |
|                                   | 5        | 26.1                  | (25.6,26.7) | 0.54 | 2.57      | 1.47 | (1.39,1.55) |
| Daytime consultations             | 1        | 77.4                  | (76.9,77.9) | 3.22 | 1         | 1    | Reference   |
|                                   | 2        | 79.9                  | (79.4,80.4) | 3.46 | 1.07      | 1.04 | (1.02,1.06) |
|                                   | 3        | 82.1                  | (81.6,82.6) | 3.82 | 1.18      | 1.10 | (1.07,1.12) |
|                                   | 4        | 84.7                  | (84.2,85.2) | 4.45 | 1.38      | 1.18 | (1.16,1.20) |
|                                   | 5        | 88.7                  | (88.3,89.2) | 5.5  | 1.71      | 1.28 | (1.25,1.30) |

PSS: Perceived Stress Scale. CI: Confidence interval. CIP<sub>1y</sub>: Cumulative incidence proportion at one year (in %). IR: Incidence rate. IRR: Incidence rate ratio.

\*: adjusted for sex, age as 10-year age bands, presence of each of the 39 psychiatric and physical conditions in the multimorbidity index, socioeconomic factors, and lifestyle on index date.

1  
2  
3  
4  
5 **Figure 1. Cumulative incidence proportions and incidence rate ratios of mental health related primary**  
6 **care services according to Perceived Stress Scale quintile and number of physical conditions.**  
7  
8  
9

10  
11 **Figure 2. Cumulative incidence proportions and incidence rate ratios of general primary care and**  
12 **chronic care services according to Perceived Stress Scale quintile and number of physical conditions.**  
13  
14  
15  
16  
17  
18  
19  
20  
21  
22  
23  
24  
25  
26  
27  
28  
29  
30  
31  
32  
33  
34  
35  
36  
37  
38  
39  
40  
41  
42  
43  
44  
45  
46  
47  
48  
49  
50  
51  
52  
53  
54  
55  
56  
57  
58  
59  
60

For peer review only



Cumulative incidence proportions and incidence rate ratios of mental health related primary care services according to Perceived Stress Scale quintile and number of physical conditions.

228x187mm (300 x 300 DPI)



Cumulative incidence proportions and incidence rate ratios of general primary care and chronic care services according to Perceived Stress Scale quintile and number of physical conditions.

228x187mm (300 x 300 DPI)

Only

## Supplemental file

### **The association between perceived stress, multimorbidity, and primary care health services – a Danish population-based cohort study**

eTable 1. Multimorbidity index diseases

eTable 2. Classification codes for services and prescriptions

eTable 3. Incidence rate ratios of primary care services according to Perceived Stress Scale quintile for persons without psychiatric illness (N=109,137)

eTable 4. Incidence rate ratios for primary care activities requested by non-respondents versus respondents

eTable 5. Incidence rate ratios for general primary care services in persons with any psychiatric condition versus persons without psychiatric conditions according to survey response status

**eTable 1. Multimorbidity index diseases**

| Category                     | Disease group                              |
|------------------------------|--------------------------------------------|
| Circulatory system           | Hypertension                               |
|                              | Dyslipidemia                               |
|                              | Ischemic heart disease                     |
|                              | Atrial fibrillation                        |
|                              | Heart failure                              |
|                              | Peripheral artery occlusive disease        |
| Endocrine system             | Stroke                                     |
|                              | Diabetes mellitus                          |
|                              | Thyroid disorder                           |
| Pulmonary system and allergy | Gout                                       |
|                              | Chronic pulmonary disease                  |
| Gastrointestinal system      | Allergy                                    |
|                              | Ulcer/chronic gastritis                    |
|                              | Chronic liver disease                      |
|                              | Inflammatory bowel disease                 |
| Urogenital system            | Diverticular disease of intestine          |
|                              | Chronic kidney disease                     |
|                              | Prostate disorders                         |
| Musculoskeletal system       | Connective tissue disorders                |
|                              | Osteoporosis                               |
|                              | Painful condition                          |
| Haematological system        | Anaemias                                   |
|                              | HIV/AIDS                                   |
| Cancers                      | Cancer                                     |
| Neurological system          | Vision problem                             |
|                              | Hearing problem                            |
|                              | Migraine                                   |
|                              | Epilepsy                                   |
|                              | Parkinson's disease                        |
|                              | Multiple sclerosis                         |
|                              | Neuropathies                               |
| Mental health conditions     | Mood, stress-related, or anxiety disorders |
|                              | Psychological distress                     |
|                              | Alcohol problems                           |
|                              | Substance abuse                            |
|                              | Anorexia/bulimia                           |
|                              | Bipolar affective disorder                 |
|                              | Schizophrenia or schizoaffective disorder  |
|                              | Dementia                                   |

HIV: human immunodeficiency virus; AIDS: acquired immunodeficiency syndrome.

<sup>a</sup>For details and coding definitions, please see Prior A, Fenger-Grøn M, Larsen KK, et al. The association between perceived stress and mortality among people with multimorbidity: A prospective population-based cohort study. *Am J Epidemiol* 2016;184:199-210.

**eTable 2. Classification codes for services and prescriptions**

| Outcome                                                       | Danish National Health Service Register service codes*       | ATC prescription codes                                  |
|---------------------------------------------------------------|--------------------------------------------------------------|---------------------------------------------------------|
| Talk therapy by GP                                            | 4003, 4021-4027, 4050, 4063, 4106, 4247-4249, 6101 (daytime) |                                                         |
| Psychometric tests                                            | 2149 (daytime)                                               |                                                         |
| Psychologist services                                         | 0100-0299, 1000-3999 (daytime)                               |                                                         |
| Psychiatrist services                                         | 0110-0140, 0210-0236 (daytime)                               |                                                         |
| Antidepressant prescriptions                                  |                                                              | N06AB, N06AF, N06AG, N06AX (N06AX12 & N06AX05 excluded) |
| Anxiolytics prescriptions                                     |                                                              | N05BA, N05BE                                            |
| Hypnotics prescriptions                                       |                                                              | N05CD, N05CF, N05CH                                     |
| Daytime consultations                                         | 0101 (daytime)                                               |                                                         |
| Out-of-hours contacts (telephone, consultations, home visits) | 0501, 0602, 04XX (out-of-hours)                              |                                                         |
| Annual chronic care consultations                             | 0106, 0120 (daytime)                                         |                                                         |
| Spirometries                                                  | 7113 (daytime)                                               |                                                         |
| Blood sugar measures                                          | 7136 (daytime)                                               |                                                         |
| ECGs                                                          | 7156 (daytime)                                               |                                                         |
| Home blood pressure measures                                  | 2146 (daytime)                                               |                                                         |

ATC: Anatomical Therapeutic Chemical classification.

\* Provider specialty is general practice (codes 80-89), except for psychologists services (code 63) and psychiatrist services (code 24).

**eTable 3. Incidence rate ratios of primary care services according to Perceived Stress Scale quintile for persons without psychiatric illness (N=109,137)**

| Activity                      | PSS quintile | Adj. IRR* | 95% CI        | Activity                         | PSS quintile | Adj. IRR* | 95% CI      |
|-------------------------------|--------------|-----------|---------------|----------------------------------|--------------|-----------|-------------|
| Talk therapy by GP            | 1            | 1         | Reference     | Spirometries                     | 1            | 1         | Reference   |
|                               | 2            | 1.36      | (1.12,1.66)   |                                  | 2            | 1.10      | (0.98,1.24) |
|                               | 3            | 1.61      | (1.32,1.96)   |                                  | 3            | 1.07      | (0.94,1.21) |
|                               | 4            | 2.39      | (1.98,2.89)   |                                  | 4            | 1.15      | (1.01,1.30) |
|                               | 5            | 5.22      | (4.36,6.26)   |                                  | 5            | 1.16      | (1.01,1.32) |
| Psychometric tests            | 1            | 1         | Reference     | Blood sugar measures             | 1            | 1         | Reference   |
|                               | 2            | 1.26      | (1.05,1.52)   |                                  | 2            | 1.03      | (0.98,1.08) |
|                               | 3            | 1.78      | (1.47,2.16)   |                                  | 3            | 1.06      | (1.00,1.11) |
|                               | 4            | 2.14      | (1.78,2.58)   |                                  | 4            | 1.09      | (1.04,1.16) |
|                               | 5            | 3.99      | (3.33,4.78)   |                                  | 5            | 1.12      | (1.06,1.19) |
| Psychologist services         | 1            | 1         | Reference     | ECGs                             | 1            | 1         | Reference   |
|                               | 2            | 1.53      | (1.09,2.15)   |                                  | 2            | 1.05      | (0.99,1.12) |
|                               | 3            | 1.97      | (1.43,2.72)   |                                  | 3            | 1.08      | (1.01,1.16) |
|                               | 4            | 3.05      | (2.21,4.23)   |                                  | 4            | 1.16      | (1.09,1.24) |
|                               | 5            | 6.83      | (5.05,9.23)   |                                  | 5            | 1.15      | (1.07,1.24) |
| Psychiatrist services         | 1            | 1         | Reference     | Home blood pressure measures     | 1            | 1         | Reference   |
|                               | 2            | 2.17      | (1.12,4.19)   |                                  | 2            | 1.06      | (0.97,1.15) |
|                               | 3            | 2.32      | (1.14,4.71)   |                                  | 3            | 1.04      | (0.95,1.14) |
|                               | 4            | 5.69      | (3.08,10.52)  |                                  | 4            | 1.09      | (1.00,1.20) |
|                               | 5            | 25.45     | (14.54,44.54) |                                  | 5            | 1.04      | (0.93,1.15) |
| Antidepressants prescriptions | 1            | 1         | Reference     | Annual chronic care consultation | 1            | 1         | Reference   |
|                               | 2            | 1.30      | (1.04,1.63)   |                                  | 2            | 1.03      | (0.98,1.07) |
|                               | 3            | 2.22      | (1.78,2.76)   |                                  | 3            | 1.05      | (1.00,1.11) |
|                               | 4            | 2.84      | (2.31,3.50)   |                                  | 4            | 1.09      | (1.04,1.15) |
|                               | 5            | 6.79      | (5.59,8.25)   |                                  | 5            | 1.24      | (1.17,1.31) |
| Anxiolytics prescriptions     | 1            | 1         | Reference     | Out-of-hours contacts            | 1            | 1         | Reference   |
|                               | 2            | 1.54      | (1.27,1.87)   |                                  | 2            | 1.07      | (1.01,1.13) |
|                               | 3            | 2.07      | (1.69,2.55)   |                                  | 3            | 1.13      | (1.07,1.19) |
|                               | 4            | 2.67      | (2.21,3.24)   |                                  | 4            | 1.23      | (1.16,1.30) |
|                               | 5            | 5.01      | (4.18,6.00)   |                                  | 5            | 1.47      | (1.39,1.55) |
| Hypnotics prescriptions       | 1            | 1         | Reference     | Daytime consultations            | 1            | 1         | Reference   |
|                               | 2            | 1.33      | (1.17,1.51)   |                                  | 2            | 1.04      | (1.02,1.06) |
|                               | 3            | 1.61      | (1.41,1.84)   |                                  | 3            | 1.09      | (1.07,1.12) |
|                               | 4            | 1.86      | (1.63,2.12)   |                                  | 4            | 1.17      | (1.14,1.19) |
|                               | 5            | 2.96      | (2.59,3.38)   |                                  | 5            | 1.28      | (1.25,1.31) |

PSS: Perceived Stress Scale. IRR: Incidence rate ratio.

\*: adjusted for sex, age as 10-year age bands, presence of each of the 39 psychiatric and physical conditions in the multimorbidity index, socioeconomic factors, and lifestyle on index date.



**eTable 4. Incidence rate ratios for primary care activities requested by non-respondents versus respondents**

| Activity                         | Non-respondent |             | Non-respondent adjusted |             |
|----------------------------------|----------------|-------------|-------------------------|-------------|
|                                  | crude IRR      | 95% CI      | IRR*                    | 95% CI      |
| Talk therapy by GP               | 1.18           | (1.11,1.25) | 1.23                    | (1.15,1.31) |
| Psychometric tests               | 1.20           | (1.13,1.27) | 1.14                    | (1.07,1.22) |
| Psychologist services            | 0.93           | (0.85,1.02) | 0.95                    | (0.83,1.09) |
| Psychiatrist services            | 1.32           | (1.20,1.46) | 1.46                    | (1.23,1.73) |
| Antidepressant prescriptions     | 1.96           | (1.88,2.03) | 1.46                    | (1.37,1.56) |
| Anxiolytics prescriptions        | 2.34           | (2.20,2.48) | 1.93                    | (1.78,2.09) |
| Hypnotics prescriptions          | 1.70           | (1.62,1.79) | 1.38                    | (1.30,1.47) |
| Spirometries                     | 0.86           | (0.81,0.91) | 0.94                    | (0.88,0.99) |
| Blood sugar measures             | 0.94           | (0.91,0.96) | 0.97                    | (0.95,1.00) |
| ECGs                             | 0.82           | (0.79,0.85) | 0.88                    | (0.86,0.91) |
| Home blood pressure measures     | 0.74           | (0.70,0.77) | 0.88                    | (0.84,0.93) |
| Annual chronic care consultation | 0.88           | (0.86,0.90) | 0.93                    | (0.91,0.96) |
| Out-of-hours contacts            | 1.59           | (1.51,1.68) | 1.20                    | (1.17,1.23) |
| Daytime consultations            | 0.94           | (0.93,0.95) | 0.95                    | (0.94,0.96) |

IRR: Incidence rate ratios.

\*: IRRs adjusted for sex, age as 10-year age bands, presence of each of the 39 psychiatric and physical conditions in the multimorbidity index, cohabitation status, and educational level on index date.

The reference for each activity is survey respondents.

**eTable 5. Incidence rate ratios for general primary care services in persons with any psychiatric condition versus persons without psychiatric conditions according to survey response status**

| Activity                         | Any psychiatric condition | Respondents |             | Non-respondents |             |
|----------------------------------|---------------------------|-------------|-------------|-----------------|-------------|
|                                  |                           | Adj. IRR    | 95% CI      | Adj. IRR        | 95% CI      |
| Annual chronic care consultation | No                        | 1           | Reference   | 1               | Reference   |
|                                  | Yes                       | 1.39        | (1.15,1.68) | 1.26            | (1.04,1.53) |
| Out-of-hours contacts            | No                        | 1           | Reference   | 1               | Reference   |
|                                  | Yes                       | 1.77        | (1.43,2.18) | 1.85            | (1.50,2.28) |
| Daytime consultations            | No                        | 1           | Reference   | 1               | Reference   |
|                                  | Yes                       | 1.35        | (1.24,1.48) | 1.33            | (1.21,1.45) |

IRR: Incidence rate ratios.

\*: IRRs adjusted for sex, age as 10-year age bands, presence of each of the 39 psychiatric and physical conditions in the multimorbidity index, cohabitation status and educational level on index date.

## STROBE Statement—checklist of items that should be included in reports of observational studies

|                              | Item No | Recommendation                                                                                                                                                                                                                                                                                                                                                                                                                                                         | Described on page            |
|------------------------------|---------|------------------------------------------------------------------------------------------------------------------------------------------------------------------------------------------------------------------------------------------------------------------------------------------------------------------------------------------------------------------------------------------------------------------------------------------------------------------------|------------------------------|
| <b>Title and abstract</b>    | 1       | (a) Indicate the study's design with a commonly used term in the title or the abstract                                                                                                                                                                                                                                                                                                                                                                                 | 1–2                          |
|                              |         | (b) Provide in the abstract an informative and balanced summary of what was done and what was found                                                                                                                                                                                                                                                                                                                                                                    | 2–3                          |
| <b>Introduction</b>          |         |                                                                                                                                                                                                                                                                                                                                                                                                                                                                        |                              |
| Background/rationale         | 2       | Explain the scientific background and rationale for the investigation being reported                                                                                                                                                                                                                                                                                                                                                                                   | 5                            |
| Objectives                   | 3       | State specific objectives, including any prespecified hypotheses                                                                                                                                                                                                                                                                                                                                                                                                       | 5                            |
| <b>Methods</b>               |         |                                                                                                                                                                                                                                                                                                                                                                                                                                                                        |                              |
| Study design                 | 4       | Present key elements of study design early in the paper                                                                                                                                                                                                                                                                                                                                                                                                                | 5                            |
| Setting                      | 5       | Describe the setting, locations, and relevant dates, including periods of recruitment, exposure, follow-up, and data collection                                                                                                                                                                                                                                                                                                                                        | 5–7                          |
| Participants                 | 6       | (a) <i>Cohort study</i> —Give the eligibility criteria, and the sources and methods of selection of participants. Describe methods of follow-up<br><i>Case-control study</i> —Give the eligibility criteria, and the sources and methods of case ascertainment and control selection. Give the rationale for the choice of cases and controls<br><i>Cross-sectional study</i> —Give the eligibility criteria, and the sources and methods of selection of participants | 5–6                          |
|                              |         | (b) <i>Cohort study</i> —For matched studies, give matching criteria and number of exposed and unexposed<br><i>Case-control study</i> —For matched studies, give matching criteria and the number of controls per case                                                                                                                                                                                                                                                 |                              |
| Variables                    | 7       | Clearly define all outcomes, exposures, predictors, potential confounders, and effect modifiers. Give diagnostic criteria, if applicable                                                                                                                                                                                                                                                                                                                               | 5–7,<br>eTable 1<br>eTable 2 |
| Data sources/<br>measurement | 8*      | For each variable of interest, give sources of data and details of methods of assessment (measurement). Describe comparability of assessment methods if there is more than one group                                                                                                                                                                                                                                                                                   | 6–7,<br>eTable 1<br>eTable 2 |
| Bias                         | 9       | Describe any efforts to address potential sources of bias                                                                                                                                                                                                                                                                                                                                                                                                              | 7–8                          |
| Study size                   | 10      | Explain how the study size was arrived at                                                                                                                                                                                                                                                                                                                                                                                                                              | 5–6                          |
| Quantitative variables       | 11      | Explain how quantitative variables were handled in the analyses. If applicable, describe which groupings were chosen and why                                                                                                                                                                                                                                                                                                                                           | 6–8                          |
| Statistical methods          | 12      | (a) Describe all statistical methods, including those used to control for confounding                                                                                                                                                                                                                                                                                                                                                                                  | 8                            |
|                              |         | (b) Describe any methods used to examine subgroups and interactions                                                                                                                                                                                                                                                                                                                                                                                                    | 8                            |
|                              |         | (c) Explain how missing data were addressed                                                                                                                                                                                                                                                                                                                                                                                                                            | 8                            |
|                              |         | (d) <i>Cohort study</i> —If applicable, explain how loss to follow-up was addressed<br><i>Case-control study</i> —If applicable, explain how matching of cases and controls was addressed<br><i>Cross-sectional study</i> —If applicable, describe analytical methods                                                                                                                                                                                                  | 6–8                          |

|                          |     |                                                                                                                                                                                                              |                                              |
|--------------------------|-----|--------------------------------------------------------------------------------------------------------------------------------------------------------------------------------------------------------------|----------------------------------------------|
|                          |     | taking account of sampling strategy                                                                                                                                                                          |                                              |
|                          |     | (e) Describe any sensitivity analyses                                                                                                                                                                        | 8                                            |
| <b>Results</b>           |     |                                                                                                                                                                                                              |                                              |
| Participants             | 13* | (a) Report numbers of individuals at each stage of study—eg numbers potentially eligible, examined for eligibility, confirmed eligible, included in the study, completing follow-up, and analysed            | 5, 8                                         |
|                          |     | (b) Give reasons for non-participation at each stage                                                                                                                                                         | 5                                            |
|                          |     | (c) Consider use of a flow diagram                                                                                                                                                                           |                                              |
| Descriptive data         | 14* | (a) Give characteristics of study participants (eg demographic, clinical, social) and information on exposures and potential confounders                                                                     | 8, 9, Table 1                                |
|                          |     | (b) Indicate number of participants with missing data for each variable of interest                                                                                                                          | 9                                            |
|                          |     | (c) <i>Cohort study</i> —Summarise follow-up time (eg, average and total amount)                                                                                                                             | 8                                            |
| Outcome data             | 15* | <i>Cohort study</i> —Report numbers of outcome events or summary measures over time                                                                                                                          | 8<br>Table 2–3                               |
|                          |     | <i>Case-control study</i> —Report numbers in each exposure category, or summary measures of exposure                                                                                                         |                                              |
|                          |     | <i>Cross-sectional study</i> —Report numbers of outcome events or summary measures                                                                                                                           |                                              |
| Main results             | 16  | (a) Give unadjusted estimates and, if applicable, confounder-adjusted estimates and their precision (eg, 95% confidence interval). Make clear which confounders were adjusted for and why they were included | 8, 9, Table 2–3                              |
|                          |     | (b) Report category boundaries when continuous variables were categorized                                                                                                                                    | Table 1                                      |
|                          |     | (c) If relevant, consider translating estimates of relative risk into absolute risk for a meaningful time period                                                                                             | Table 2–3                                    |
| Other analyses           | 17  | Report other analyses done—eg analyses of subgroups and interactions, and sensitivity analyses                                                                                                               | 10, Figure 1–2, eTable 3, eTable 4, eTable 5 |
| <b>Discussion</b>        |     |                                                                                                                                                                                                              |                                              |
| Key results              | 18  | Summarise key results with reference to study objectives                                                                                                                                                     | 10                                           |
| Limitations              | 19  | Discuss limitations of the study, taking into account sources of potential bias or imprecision. Discuss both direction and magnitude of any potential bias                                                   | 11–12                                        |
| Interpretation           | 20  | Give a cautious overall interpretation of results considering objectives, limitations, multiplicity of analyses, results from similar studies, and other relevant evidence                                   | 12–14                                        |
| Generalisability         | 21  | Discuss the generalisability (external validity) of the study results                                                                                                                                        | 11, 13                                       |
| <b>Other information</b> |     |                                                                                                                                                                                                              |                                              |
| Funding                  | 22  | Give the source of funding and the role of the funders for the present study and, if applicable, for the original study on which the present article is based                                                | 15                                           |

\*Give information separately for cases and controls in case-control studies and, if applicable, for exposed and unexposed groups in cohort and cross-sectional studies.

**Note:** An Explanation and Elaboration article discusses each checklist item and gives methodological background and published examples of transparent reporting. The STROBE checklist is best used in conjunction with this article (freely available on the Web sites of PLoS Medicine at <http://www.plosmedicine.org/>, Annals of Internal Medicine at

1  
2  
3  
4  
5  
6  
7  
8  
9  
10  
11  
12  
13  
14  
15  
16  
17  
18  
19  
20  
21  
22  
23  
24  
25  
26  
27  
28  
29  
30  
31  
32  
33  
34  
35  
36  
37  
38  
39  
40  
41  
42  
43  
44  
45  
46  
47  
48  
49  
50  
51  
52  
53  
54  
55  
56  
57  
58  
59  
60

<http://www.annals.org/>, and *Epidemiology* at <http://www.epidem.com/>). Information on the STROBE Initiative is available at [www.strobe-statement.org](http://www.strobe-statement.org).

For peer review only
