# Supplementary material for: Association between perceived stress, multimorbidity and primary care health services: a Danish population-based cohort study
Source: PubMed Central journal article supplement — BMJ Open. 2018 Feb 24;8(2):e018323. doi: 10.1136/bmjopen-2017-018323 (PMC5855234; doi:10.1136/bmjopen-2017-018323), 2018-02-24
Supplement: bmjopen-2017-018323supp001.pdf [file bmjopen-2017-018323supp001.pdf]

## Supplemental file

### The association between perceived stress, multimorbidity, and primary care health services – a Danish population-based cohort study

eTable 1. Multimorbidity index diseases

eTable 2. Classification codes for services and prescriptions

eTable 3. Incidence rate ratios of primary care services according to Perceived Stress Scale quintile for persons without psychiatric illness (N=109,137)

eTable 4. Incidence rate ratios for primary care activities requested by non-respondents versus respondents

eTable 5. Incidence rate ratios for general primary care services in persons with any psychiatric condition versus persons without psychiatric conditions according to survey response status

**eTable 1. Multimorbidity index diseases**

| Category                     | Disease group                              |
|------------------------------|--------------------------------------------|
| Circulatory system           | Hypertension                               |
|                              | Dyslipidemia                               |
|                              | Ischemic heart disease                     |
|                              | Atrial fibrillation                        |
|                              | Heart failure                              |
|                              | Peripheral artery occlusive disease        |
|                              | Stroke                                     |
| Endocrine system             | Diabetes mellitus                          |
|                              | Thyroid disorder                           |
|                              | Gout                                       |
| Pulmonary system and allergy | Chronic pulmonary disease                  |
|                              | Allergy                                    |
| Gastrointestinal system      | Ulcer/chronic gastritis                    |
|                              | Chronic liver disease                      |
|                              | Inflammatory bowel disease                 |
|                              | Diverticular disease of intestine          |
|                              | Chronic kidney disease                     |
| Urogenital system            | Prostate disorders                         |
|                              | Connective tissue disorders                |
| Musculoskeletal system       | Osteoporosis                               |
|                              | Painful condition                          |
|                              | Anaemias                                   |
| Haematological system        | HIV/AIDS                                   |
|                              | Cancer                                     |
| Cancers                      | Vision problem                             |
| Neurological system          | Hearing problem                            |
|                              | Migraine                                   |
|                              | Epilepsy                                   |
|                              | Parkinson's disease                        |
|                              | Multiple sclerosis                         |
|                              | Neuropathies                               |
|                              | Mood, stress-related, or anxiety disorders |
|                              | Psychological distress                     |
| Mental health conditions     | Alcohol problems                           |
|                              | Substance abuse                            |
|                              | Anorexia/bulimia                           |
|                              | Bipolar affective disorder                 |
|                              | Schizophrenia or schizoaffective disorder  |
|                              | Dementia                                   |

HIV: human immunodeficiency virus; AIDS: acquired immunodeficiency syndrome.

<sup>a</sup>For details and coding definitions, please see Prior A, Fenger-Grøn M, Larsen KK, et al. The association between perceived stress and mortality among people with multimorbidity: A prospective population-based cohort study. *Am J Epidemiol* 2016;184:199-210.

**eTable 2. Classification codes for services and prescriptions**

| Outcome                                                       | Danish National Health Service Register service codes*       | ATC prescription codes                                  |
|---------------------------------------------------------------|--------------------------------------------------------------|---------------------------------------------------------|
| Talk therapy by GP                                            | 4003, 4021-4027, 4050, 4063, 4106, 4247-4249, 6101 (daytime) |                                                         |
| Psychometric tests                                            | 2149 (daytime)                                               |                                                         |
| Psychologist services                                         | 0100-0299, 1000-3999 (daytime)                               |                                                         |
| Psychiatrist services                                         | 0110-0140, 0210-0236 (daytime)                               |                                                         |
| Antidepressant prescriptions                                  |                                                              | N06AB, N06AF, N06AG, N06AX (N06AX12 & N06AX05 excluded) |
| Anxiolytics prescriptions                                     |                                                              | N05BA, N05BE                                            |
| Hypnotics prescriptions                                       |                                                              | N05CD, N05CF, N05CH                                     |
| Daytime consultations                                         | 0101 (daytime)                                               |                                                         |
| Out-of-hours contacts (telephone, consultations, home visits) | 0501, 0602, 04XX (out-of-hours)                              |                                                         |
| Annual chronic care consultations                             | 0106, 0120 (daytime)                                         |                                                         |
| Spirometries                                                  | 7113 (daytime)                                               |                                                         |
| Blood sugar measures                                          | 7136 (daytime)                                               |                                                         |
| ECGs                                                          | 7156 (daytime)                                               |                                                         |
| Home blood pressure measures                                  | 2146 (daytime)                                               |                                                         |

ATC: Anatomical Therapeutic Chemical classification.

\* Provider specialty is general practice (codes 80-89), except for psychologists services (code 63) and psychiatrist services (code 24).

**eTable 3. Incidence rate ratios of primary care services according to Perceived Stress Scale quintile for persons without psychiatric illness (N=109,137)**

| Activity                      | PSS quintile | Adj. IRR* | 95% CI        | Activity                         | PSS quintile | Adj. IRR* | 95% CI      |
|-------------------------------|--------------|-----------|---------------|----------------------------------|--------------|-----------|-------------|
| Talk therapy by GP            | 1            | 1         | Reference     | Spirometries                     | 1            | 1         | Reference   |
|                               | 2            | 1.36      | (1.12,1.66)   |                                  | 2            | 1.10      | (0.98,1.24) |
|                               | 3            | 1.61      | (1.32,1.96)   |                                  | 3            | 1.07      | (0.94,1.21) |
|                               | 4            | 2.39      | (1.98,2.89)   |                                  | 4            | 1.15      | (1.01,1.30) |
|                               | 5            | 5.22      | (4.36,6.26)   |                                  | 5            | 1.16      | (1.01,1.32) |
| Psychometric tests            | 1            | 1         | Reference     | Blood sugar measures             | 1            | 1         | Reference   |
|                               | 2            | 1.26      | (1.05,1.52)   |                                  | 2            | 1.03      | (0.98,1.08) |
|                               | 3            | 1.78      | (1.47,2.16)   |                                  | 3            | 1.06      | (1.00,1.11) |
|                               | 4            | 2.14      | (1.78,2.58)   |                                  | 4            | 1.09      | (1.04,1.16) |
|                               | 5            | 3.99      | (3.33,4.78)   |                                  | 5            | 1.12      | (1.06,1.19) |
| Psychologist services         | 1            | 1         | Reference     | ECGs                             | 1            | 1         | Reference   |
|                               | 2            | 1.53      | (1.09,2.15)   |                                  | 2            | 1.05      | (0.99,1.12) |
|                               | 3            | 1.97      | (1.43,2.72)   |                                  | 3            | 1.08      | (1.01,1.16) |
|                               | 4            | 3.05      | (2.21,4.23)   |                                  | 4            | 1.16      | (1.09,1.24) |
|                               | 5            | 6.83      | (5.05,9.23)   |                                  | 5            | 1.15      | (1.07,1.24) |
| Psychiatrist services         | 1            | 1         | Reference     | Home blood pressure measures     | 1            | 1         | Reference   |
|                               | 2            | 2.17      | (1.12,4.19)   |                                  | 2            | 1.06      | (0.97,1.15) |
|                               | 3            | 2.32      | (1.14,4.71)   |                                  | 3            | 1.04      | (0.95,1.14) |
|                               | 4            | 5.69      | (3.08,10.52)  |                                  | 4            | 1.09      | (1.00,1.20) |
|                               | 5            | 25.45     | (14.54,44.54) |                                  | 5            | 1.04      | (0.93,1.15) |
| Antidepressants prescriptions | 1            | 1         | Reference     | Annual chronic care consultation | 1            | 1         | Reference   |
|                               | 2            | 1.30      | (1.04,1.63)   |                                  | 2            | 1.03      | (0.98,1.07) |
|                               | 3            | 2.22      | (1.78,2.76)   |                                  | 3            | 1.05      | (1.00,1.11) |
|                               | 4            | 2.84      | (2.31,3.50)   |                                  | 4            | 1.09      | (1.04,1.15) |
|                               | 5            | 6.79      | (5.59,8.25)   |                                  | 5            | 1.24      | (1.17,1.31) |
| Anxiolytics prescriptions     | 1            | 1         | Reference     | Out-of-hours contacts            | 1            | 1         | Reference   |
|                               | 2            | 1.54      | (1.27,1.87)   |                                  | 2            | 1.07      | (1.01,1.13) |
|                               | 3            | 2.07      | (1.69,2.55)   |                                  | 3            | 1.13      | (1.07,1.19) |
|                               | 4            | 2.67      | (2.21,3.24)   |                                  | 4            | 1.23      | (1.16,1.30) |
|                               | 5            | 5.01      | (4.18,6.00)   |                                  | 5            | 1.47      | (1.39,1.55) |
| Hypnotics prescriptions       | 1            | 1         | Reference     | Daytime consultations            | 1            | 1         | Reference   |
|                               | 2            | 1.33      | (1.17,1.51)   |                                  | 2            | 1.04      | (1.02,1.06) |
|                               | 3            | 1.61      | (1.41,1.84)   |                                  | 3            | 1.09      | (1.07,1.12) |
|                               | 4            | 1.86      | (1.63,2.12)   |                                  | 4            | 1.17      | (1.14,1.19) |
|                               | 5            | 2.96      | (2.59,3.38)   |                                  | 5            | 1.28      | (1.25,1.31) |

PSS: Perceived Stress Scale. IRR: Incidence rate ratio.

\*: adjusted for sex, age as 10-year age bands, presence of each of the 39 psychiatric and physical conditions in the multimorbidity index, socioeconomic factors, and lifestyle on index date.

**eTable 4. Incidence rate ratios for primary care activities requested by non-respondents versus respondents**

| Activity                         | Non-respondent |             | Non-respondent adjusted |             |
|----------------------------------|----------------|-------------|-------------------------|-------------|
|                                  | crude IRR      | 95% CI      | IRR*                    | 95% CI      |
| Talk therapy by GP               | 1.18           | (1.11,1.25) | 1.23                    | (1.15,1.31) |
| Psychometric tests               | 1.20           | (1.13,1.27) | 1.14                    | (1.07,1.22) |
| Psychologist services            | 0.93           | (0.85,1.02) | 0.95                    | (0.83,1.09) |
| Psychiatrist services            | 1.32           | (1.20,1.46) | 1.46                    | (1.23,1.73) |
| Antidepressant prescriptions     | 1.96           | (1.88,2.03) | 1.46                    | (1.37,1.56) |
| Anxiolytics prescriptions        | 2.34           | (2.20,2.48) | 1.93                    | (1.78,2.09) |
| Hypnotics prescriptions          | 1.70           | (1.62,1.79) | 1.38                    | (1.30,1.47) |
| Spirometries                     | 0.86           | (0.81,0.91) | 0.94                    | (0.88,0.99) |
| Blood sugar measures             | 0.94           | (0.91,0.96) | 0.97                    | (0.95,1.00) |
| ECGs                             | 0.82           | (0.79,0.85) | 0.88                    | (0.86,0.91) |
| Home blood pressure measures     | 0.74           | (0.70,0.77) | 0.88                    | (0.84,0.93) |
| Annual chronic care consultation | 0.88           | (0.86,0.90) | 0.93                    | (0.91,0.96) |
| Out-of-hours contacts            | 1.59           | (1.51,1.68) | 1.20                    | (1.17,1.23) |
| Daytime consultations            | 0.94           | (0.93,0.95) | 0.95                    | (0.94,0.96) |

IRR: Incidence rate ratios.

\*: IRRs adjusted for sex, age as 10-year age bands, presence of each of the 39 psychiatric and physical conditions in the multimorbidity index, cohabitation status, and educational level on index date.

The reference for each activity is survey respondents.

**eTable 5. Incidence rate ratios for general primary care services in persons with any psychiatric condition versus persons without psychiatric conditions according to survey response status**

| Activity                         | Any psychiatric condition | Respondents |             | Non-respondents |             |
|----------------------------------|---------------------------|-------------|-------------|-----------------|-------------|
|                                  |                           | Adj. IRR    | 95% CI      | Adj. IRR        | 95% CI      |
| Annual chronic care consultation | No                        | 1           | Reference   | 1               | Reference   |
|                                  | Yes                       | 1.39        | (1.15,1.68) | 1.26            | (1.04,1.53) |
| Out-of-hours contacts            | No                        | 1           | Reference   | 1               | Reference   |
|                                  | Yes                       | 1.77        | (1.43,2.18) | 1.85            | (1.50,2.28) |
| Daytime consultations            | No                        | 1           | Reference   | 1               | Reference   |
|                                  | Yes                       | 1.35        | (1.24,1.48) | 1.33            | (1.21,1.45) |

IRR: Incidence rate ratios.

\*: IRRs adjusted for sex, age as 10-year age bands, presence of each of the 39 psychiatric and physical conditions in the multimorbidity index, cohabitation status and educational level on index date.
